# Supplementary material for: A TREM2-activating antibody with a blood–brain barrier transport vehicle enhances microglial metabolism in Alzheimer’s disease models
Source: Springer Nature journal article supplement (doi:10.1038/s41593-022-01240-0), 2023-01-12
Supplement: MOESM1 [file 41593_2022_1240_MOESM1_ESM.pdf]

# **A TREM2-activating antibody with a blood–brain barrier transport vehicle enhances microglial metabolism in Alzheimer’s disease models**

In the format provided by the  
authors and unedited

## SUPPLEMENTARY INFORMATION

### SUPPLEMENTARY TABLES

**Supplementary Table 1. ATV:TREM2 demonstrates reduced or undetectable FcR binding.** Octet affinity measurements show ATV:TREM2 and ATV:ISO, which contain LALA mutations in the Fc domain, display reduced or no binding to Fc gamma receptors compared to effector positive hlgG1 positive control antibody.

| Fc gamma receptor | ATV:TREM2  | ATV:ISO    | hlgG1 control |
|-------------------|------------|------------|---------------|
| Fc gamma RI       | 380 nM     | 400 nM     | 21 nM         |
| Fc gamma RIIA     | No binding | No binding | 1.3 uM        |
| Fc gamma RIIB     | No binding | No binding | 2.9 uM        |
| Fc gamma RIIIA    | > 5 uM     | > 9 uM     | 1.3 uM        |

### Supplementary Table 2. Animal information for *in vivo* studies.

| Institution where study was conducted | Mouse genotype/age/sex                                                                                                                                                 | Corresponding figure                                                |
|---------------------------------------|------------------------------------------------------------------------------------------------------------------------------------------------------------------------|---------------------------------------------------------------------|
| Denali                                | WT; TfR <sup>mu/hu</sup> /2 months/male only                                                                                                                           | Fig. 1A                                                             |
| Denali                                | WT; TfR <sup>mu/hu</sup> /3 months/male only                                                                                                                           | Fig. 1B, left<br>Fig. 1C-H<br>Extended Data 1A-D<br>Extended Data 2 |
| Denali                                | WT; TfR <sup>mu/hu</sup> /8 months/only 1 female in ATV:ISO group, the other are all male<br><i>App</i> <sup>SAA</sup> ; TfR <sup>mu/hu</sup> mice /8 months/male only | Fig. 1B, right<br>Fig. 1C-H<br>Extended Data 1A-E                   |
| Denali                                | WT; TfR <sup>mu/hu</sup> /3 months/male only                                                                                                                           | Suppl. Fig 1L                                                       |
| Denali                                | WT; TfR <sup>mu/hu</sup> /4 months/male only                                                                                                                           | Suppl. Fig 1I-K                                                     |

|         |                                                                                                                           |                                      |
|---------|---------------------------------------------------------------------------------------------------------------------------|--------------------------------------|
| Denali  | hTREM2 tg/3 months/mixed sex                                                                                              | Suppl. Fig 3B                        |
| Denali  | WT; hTREM2 tg; TfR <sup>mu/hu</sup> /4.5 months/mixed sex (male mice only in Day 1 groups, female only in Day 4 groups)   | Fig. 4A-E<br>Extended Data 6A        |
| Denali  | WT; hTREM2 tg; TfR <sup>mu/hu</sup> /3.5 months/mixed sex in all groups                                                   | Fig. 4F,<br>Extended Data 6B, C, G-I |
| Denali  | WT; hTREM2 tg; TfR <sup>mu/hu</sup> /3.5 months/mixed sex in all groups                                                   | Fig. 4G                              |
| Denali  | WT; hTREM2 tg; TfR <sup>mu/hu</sup> /3 months/mixed sex in all groups                                                     | Fig. 5L-M,<br>Extended Data 8G       |
| Denali  | WT; hTREM2 tg; TfR <sup>mu/hu</sup> /3 months/mixed sex in all groups                                                     | Extended Data 6J                     |
| Denali  | WT; hTREM2 tg; TfR <sup>mu/hu</sup> /3 months/mixed sex (male mice only in Day 1 groups, female only in Day 4 groups)     | Extended Data 6D-F                   |
| Invicro | WT; hTREM2 tg; TfR <sup>mu/hu</sup> /4-5 months/mixed sex in all groups                                                   | Extended Data 7                      |
| DZNE    | WT; hTREM2 tg; TfR <sup>mu/hu</sup> /5-6 months/mixed sex<br>5xFAD; hTREM2 tg; TfR <sup>mu/hu</sup> /4.5 months/mixed sex | Fig. 6A-H                            |
| Denali  | WT; TfR <sup>mu/hu</sup> /3 months/male only                                                                              | Suppl. Fig 1A-H and<br>Suppl. Fig 2  |
| Denali  | WT; hTREM2 tg; TfR <sup>mu/hu</sup> /5-6 months/mixed sex<br>5xFAD; hTREM2 tg; TfR <sup>mu/hu</sup> /4.5 months/mixed sex | Suppl. Fig 4                         |

11  
12  
13  
14  
15  
16  
17

**Supplementary Table 3. Statistical analysis of sex effect of ATV:TREM2 on microglia function and biomarker response.** A 2-way main effects ANOVA of sex and treatment group was used to test for sex differences in response to ATV:TREM2 for microglial phagocytic activity and CSF1R levels in brain and CSF. No significant sex differences were identified.

| <b>Endpoint</b>                           | <b>Corresponding figure panels</b> | <b>Animal N and sex</b>                       | <b>Treatment:<br/>ATV:TREM2 3, 10mg/kg, or<br/>ATV:ISO 10mg/kg</b> |
|-------------------------------------------|------------------------------------|-----------------------------------------------|--------------------------------------------------------------------|
| %pHrodo <sup>+</sup> phagocytic microglia | Fig. 4F                            | 3 Male / 5 Female in each ATV:TREM2 group     | ns, p-value = 0.4922                                               |
| Brain CSF1R                               | Extended Data Fig 6B               | 3-5 Male / 4-5 Female in each ATV:TREM2 group | ns, p-value = 0.4391                                               |
| CSF CSF1R                                 | Extended Data Fig 6C               | 5 Male / 4-5 Female in each ATV:TREM2 group   | ns, p-value = 0.0996                                               |

## EXTENDED DATA FIGURES

### Extended Data Figure 1. ATV:4D9 induces temporally dynamic microglial states

**distinct from amyloid pathology. (A)** UMAP projections of individually processed data sets for WT; TfR<sup>mu/hu</sup> timecourse and TfR<sup>mu/hu</sup>; App<sup>SAA</sup> studies. Microglia are color coded according to their experimental group. **(B)** Combined UMAP of integrated data by study. Microglia are color coded by unbiased cluster assignment. **(C)** Stacked barplots showing the proportion of microglia per biological replicate by cluster. Plots are grouped by experimental group, and each bar represents a biological replicate within that group. Barplot color scheme is consistent with clusters in **B**. **(D)** Feature plots showing expression of selected individual genes. Microglia are color coded according to log normalized expression of each gene. **(E)** Antibody concentrations detected in whole brain lysate from either WT; TfR<sup>mu/hu</sup> or TfR<sup>mu/hu</sup>; App<sup>SAA</sup> mice dosed with 10 mg/kg ATV:ISO or ATV:4D9 (n=8 mice/group, except for ATV:4D9 WT;TfR<sup>mu/hu</sup> and 4D9 APP<sup>SAA</sup>; TfR<sup>mu/hu</sup> n=4 mice/group)

### Extended Data Figure 2. ATV:4D9 induces temporally dynamic microglial

**morphology and marker expression. (A)** Representative morphometric images of microglia in the cortex 1 day post dose with ATV:ISO (10 mg/kg) or ATV:4D9 (10 mg/kg) at day 1-, 7-, 14-, and 28-days post dose. **(B)** UMAP plot of all microglia over time. **(C)** Percentage of microglia in the responsive cluster as a proportion of all segmented microglia over time (n=3 male mice per group, two-tailed unpaired t-test between ATV:ISO and ATV:4D9 at day 1, mean±SEM). **(D)** Volcano plot showing the top 6 differentially high and low normalized features comparing the responsive cluster to the

homeostatic cluster. **(E)** Heatmap of normalized features for all segmented microglia (1,143 total cells) over time, measured across 65 morphometric and immunohistochemical features, grouped by treatment (rows) with features hierarchically clustered (columns). **(F)** Representative images of cortical brain sections co-stained with Iba1 and CD74 at 1-, 7-, 14-, 28-days post 10mg/kg dose of ATV:ISO or ATV:4D9. CD74<sup>+</sup> microglia are noted with white arrows. **(G)** Mean intensity of CD74 staining within segmented Iba1<sup>+</sup> microglia normalized to background CD74 intensity at each timepoint (n=5 mice/group, two-tailed unpaired t-test between ATV:ISO and ATV:4D9 at day 1, mean±SEM). **(H)** Representative images of cortical brain sections stained for Iba1 and AXL 1 day post dose of ATV:ISO or ATV:4D9. Double positive microglia are noted with white arrows. **(I)** Quantification of mean intensity of AXL staining within segmented Iba1<sup>+</sup> microglia normalized to background (n=5 mice/group, two-tailed unpaired t-test, mean±SEM).

**Extended Data Figure 3. ATV:4D9 and ATV:TREM2 demonstrate similar mechanisms of action with high affinity stalk binding epitopes and cellular function.** **(A)** Antibody schematic comparing human specific ATV:TREM2 and mouse specific ATV:4D9 with high affinity TREM2 binding. **(B)** Epitope map of overlapping stalk binding regions for ATV:TREM2 and ATV:4D9 Fabs (space filled model of TREM2 ECD<sup>1</sup>). The binding epitope of ATV:4D9 antibody is located 12-amino acids N-terminal of the ADAM cleavage site at His157. **(C)** FACS analysis of cell binding of ATV:TREM2 to hTREM2-DAP12 HEK293 or parental cells. Endogenous TfR expression on HEK293 cells drives weak binding observed for ATV:ISO and ATV:TREM2 (n=3 independent

experiment, mean $\pm$ SEM). **(D)** FACS detection of ATV:TREM2 (100 nM) binding to WT and TREM2 KO iMG with isotype control (ATV:ISO). **(E)** Soluble TREM2 measured in the supernatant of hTREM2-DAP12 HEK293 cells dosed with ATV:TREM2 for 24h shows dose-dependent reduction of sTREM2 to levels similar to 1 $\mu$ M GM6001 (n=3 independent experiment, mean $\pm$ SEM). **(F)** ATV:TREM2 and lipid ligands induce pSyk signaling in iMG 24h post antibody exposure (n=3 independent experiments, Tukey's multiple comparisons test, mean $\pm$ SEM). **(G)** Human monocytes cultured in limited M-CSF with plate coated ATV:TREM2 or ATV:ISO shows dose-dependent activity of ATV:TREM2 (EC<sub>50</sub> 0.95  $\pm$  0.45 nM). Representative data from one out of four human donors are shown.

**Extended Data Figure 4. ATV promotes TfR-TREM2 receptor complex formation and internalization and endosomal TREM2 signaling.** **(A)** Representative Western blot of co-IP of TREM2 with TfR. hTREM2-DAP12 HEK293 cells were treated with 100 nM ATV:TREM2, anti-TREM2, or isotype controls for 5 min at 37°C. **(B)** Co-IP quantification of Western blot from (A) (n=6 independent experiments; two-tailed paired t-test for ISO vs anti-TREM2; two tailed Wilcoxon test ATV:ISO vs ATV:TREM2, mean $\pm$ SEM). **(C)** Schematic illustration of *cis*- and *trans*-activation models that could mediate pSyk enhancement by ATV:TREM2. **(D)** Western blot validation of TfR knockdown in the TfR<sup>RNAi</sup> cell line. **(E)** Cell based cis/trans assay indicates ATV:TREM2 enhances pSyk activity in cis. Relative pSYK signal is expressed as raw pSYK AlphaLisa value normalized to ATV:TREM2 treated control (n=3 independent experiment, mean $\pm$ SEM). **(F)** Normalized pSyk signal measured by AlphaLisa assay. TfR<sup>RNAi</sup> cells

95 were treated with 10 nM anti-TREM2 or ATV:TREM2 pre-incubated with a dose titration  
96 of recombinant TfR protein for 5 min at 37°C (n=3 independent experiment, mean±SEM).  
97 **(G)** Normalized pSyk signal detected by AlphaLisa. TfR<sup>RNAi</sup> cells were treated with 10 nM  
98 anti-TREM2 or ATV:TREM2 pre-incubated with a dose titration of a secondary anti-  
99 human IgG Fc antibody for 5 min at 37°C (n=3 independent experiment, mean±SEM) **(H)**  
100 Immunofluorescence microscopy of hTREM2-DAP12 HEK293 cells demonstrates  
101 reduction of surface TREM2 levels with ATV:TREM2 vs anti-TREM2, no changes in total  
102 TREM2 levels, consistent with re-distribution of the receptor from the plasma membrane  
103 to endosomes (n=4 independent experiments except for anti-TREM2 MV (n=3), Tukey's  
104 multiple comparisons test, mean±SEM). **(I)** hTREM2-DAP12 HEK293 cells dosed with  
105 antibody for 10 minutes shows that at similar amounts of bound antibody detected by anti-  
106 IgG (representing 5 nM of ATV:TREM2 and 10 nM of anti-TREM2, n=4 independent  
107 experiments, Tukey's multiple comparisons test, mean±SEM) **(J)** Images depicting  
108 masking algorithm used to identify whether TfR-Alexa-647 labeled recycling endosomes  
109 (rainbow spots in middle images) either contain (green spots in right-most images) or do  
110 not contain (red spots in right-most images) IgG spots (white spots in left-most image)  
111 upon dosing with anti-TREM2 (top row) or ATV:TREM2 (bottom row) for 10 minutes with  
112 10 nM antibody. **(K)** Representative images for hTREM2-DAP HEK293 cells dosed with  
113 10 nM antibody for 10 minutes including 20 ug/mL TfR-Alexa-647, fixed, permeabilized,  
114 and stained with anti-IgG and anti-pSyk. IF shows ATV increased colocalization of  
115 antibody with pSyk in early endosomes. **(L)** Quantification of percent of IgG or pSyk spots  
116 localized within Tf-positive endosomes (n=3 independent experiments, Tukey's multiple  
117 comparisons test, mean±SEM).



**Extended Data Figure 5. ATV:TREM2 does not promote ERK1/2 phosphorylation or a proinflammatory signature in microglia.** (A) Representative Western blot images of phosphorylation of 4EBP1 (T37/46) and ERK1/2 (T202/Y204) in WT iMGs treated for 96h with 100 nM ATV:TREM2 or an isotype control. (B) Quantification of p4EBP1 (T37/46) and pERK1/2 (T202/Y204) normalized to actin. Relative expression was calculated by normalizing to PBS vehicle control for each experiment (n=4 independent experiments, two-tailed paired t-test, mean $\pm$ SEM). (C) Representative Western blot images of total protein levels of mTOR and AKT in WT iMG treated for 96 h with 100 nM ATV:TREM2 or an isotype control. (D) Quantification of total mTOR and AKT protein normalized to actin. Relative expression was calculated by normalizing to PBS control for each experiment (n=4 independent experiments, two-tailed paired t-test, mean $\pm$ SEM). (E) Representative Western blot images for p-mTOR (S2448), pAKT (S473), pGSK3b (S9) pRPS6 (S235/236), p4EBP1 (T37/46) and pERK1/2 (T202/Y204) showing inhibition of mTOR pathway activation in WT iMG co-treated with 20 nM AZD8055 and 100 nM ATV:TREM2 after 96h. (F) Quantification of phosphorylation targets shown in (E). Phosphorylation signals were normalized to actin. Relative expression was calculated by normalizing to PBS vehicle control for each experiment (n=4 independent experiments, two-tailed paired t-test, mean $\pm$ SEM)). (G) Heatmap of human cytokine profiling in supernatant from WT iMG treated with 100 nM ATV:TREM2 for 96h. Media collected from iMG treated with 10 ng/mL LPS for 24h was used for comparison.

**Extended Data Figure 6. ATV:TREM2 increases phagocytosis and CSF1R in Tfr<sup>mu/hu</sup> human TREM2 transgenic mice** (A) Antibody levels detected in brain lysates

142 by ELISA shows increased brain exposure of ATV:TREM2 (30 mg/kg) compared anti-  
143 TREM2 (30 mg/kg) and comparable brain exposure for ATV:TREM2 at 10 mg/kg and  
144 anti-TREM2 at 30 mg/kg at day 4 post-dose. (n=5 mice/group except for ATV:TREM2  
145 3mpk (n=4)). **(B)** ATV:TREM2 increases CSF1R in the brain compared to brain exposure  
146 matched anti-TREM2 day 2 post dose (n=[8, 9, 8, 9, 10]mice/group, Kruskal-Wallis test,  
147 mean±SEM). **(C)** CSF1R analysis in CSF same as in B. (n=[8, 9, 8, 9, 10]mice/group,  
148 Tukey's multiple comparisons test, mean±SEM) (B-C) Circles represents male mice and  
149 triangle represents female mice. **(D)** Detection of antibody concentrations show matched  
150 brain exposure of three ATV:TREM2 molecules with different ATV affinities 1-day post-  
151 dose (n=5 mice/group). **(E-F)** High and mid-affinity ATV:TREM2 molecules induce  
152 comparable increase of CSF1R in the brain (E, n=5 mice/group except for Veh and Day4-  
153 10mpk-8000nM (n=4), Kruskal-Wallis test, compared to vehicle group) and CSF **(F)** (n=5  
154 mice/group, except for Veh and day 4 5mpk 110nM n=4), Dunnett's multiple comparisons  
155 test for day 1, Kruskal-Wallis test for day 4) day 1 and 4 post dose whereas low-affinity  
156 ATV:TREM2 induces a weak elevation of CSF1R in CSF at day 4 (n=4-5 mice/group,  
157 mean±SEM). **(G)** Schematic of experimental approach to evaluate *in vivo* dosed antibody  
158 impact to microglial phagocytosis *ex vivo*. A single dose of ATV:TREM2, anti-TREM2, or  
159 ATV:ISO was administrated to human TREM2 tg; Tfr<sup>mu/hu</sup> KI mice and brain microglia  
160 were isolated 2 days post dose for *ex vivo* myelin phagocytosis analysis. The same  
161 method was used to assess amyloid phagocytosis. **(H)** FACS gating strategy to quantify  
162 pHrodo-myelin positive microglia. After treatment with pHrodo-green myelin and staining,  
163 cell suspensions containing microglia were analyzed using BD FACS Aria III. Single cells  
164 were separated from debris by FSC and SSC characteristics. Live microglia were

identified as a population of CD11b<sup>+</sup> and Propidium Iodide<sup>negative</sup> cells. pHrodo-myein uptake was then quantified in 20,000 microglia recorded from each sample. **(I)** Antibody concentrations were detected in brain lysates by ELISA which shows comparable levels of ATV:TREM2 and anti-TREM2 day 2 post dose (n=[9, 10, 10, 9, 10] mice/group). **(J)** ATV:TREM2 induces transcription of genes associated with phagocytosis. *Axl*, *Itgax*, *Lgals3* mRNA levels were detected in isolated brain microglia after peripheral administration of 10mg/kg ATV:TREM2 1-, 4-, and 7-days post dose. Graphs represent bulk mRNA measured by RNA-seq. Data shown as log<sub>2</sub> counts per million (with a pseudocount of 1 added) in each biological replicate (n=8 mice/group, each group compared to ATV:ISO group, Kruskal-Wallis test for *Axl*, Dunnett's multiple comparisons for *Itgax* and *Lgals3*, mean±SEM).

Extended Data Figure 7: Single photon emission computed tomography imaging demonstrates increased ATV:TREM2 biodistribution and catabolism in brain

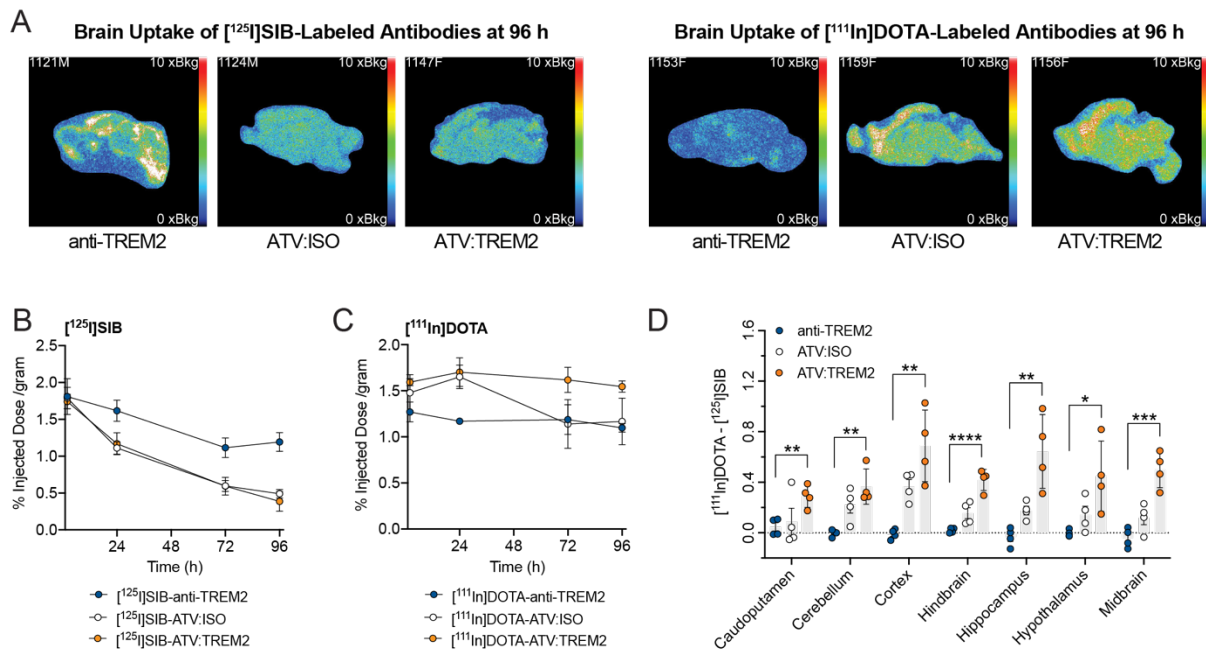

**Extended Data Figure 7. Single photon emission computed tomography imaging demonstrates increased ATV:TREM2 biodistribution and catabolism in brain. (A)**

Representative autoradiography images of sagittal brain sections from WT; hTREM2 tg; TfR<sup>mu/hu</sup> mice 96h after administration of ATV:TREM2, anti-TREM2, and ATV:ISO radiolabeled with [<sup>111</sup>In]DOTA or [<sup>125</sup>I]SIB. **(B,C)** Longitudinal SPECT/CT imaging quantification of whole-brain uptake of single dose (100  $\mu$ Ci, 200 $\mu$ L, 1.5 mg/kg, IV) ATV:TREM2, anti-TREM2, and ATV:ISO, radiolabeled with [<sup>125</sup>I]SIB **(B)** or [<sup>111</sup>In]DOTA **(C)** in WT; hTREM2 tg; TfR<sup>mu/hu</sup> mice. Whole brain %ID/g was corrected for contribution from cerebral blood volume. Data are represented as mean  $\pm$  SEM (n=3 mice/group). **(D)** Percent of catabolized ATV:TREM2 in several brain regions 96h after single dose exceeds that of ATV:ISO control. [<sup>111</sup>In]DOTA and [<sup>125</sup>I]SIB signal was quantified by *ex vivo* gamma counting in resected brain regions, and percent of catabolized antibody was estimated by subtracting %ID/g for [<sup>125</sup>I]SIB signal from that of [<sup>111</sup>In]DOTA signal (n=4 mice/group, one-way ANOVA with Dunnett's multiple comparison test for each region, except for Cerebellum which applied Brown-Forsythe and Welch ANOVA tests, mean $\pm$ SEM).

**Extended Data Figure 8. ATV:TREM2 increases microglial metabolism in a TREM2 and PLCG2-dependent manner. (A)** Additional species of triglycerides (TG) and short chain carnitines modulated in iMG with ATV:TREM2 treatment (n=3-5 independent experiment, two-tailed paired t-test, mean $\pm$ SEM). **(B)** ATV:TREM2 does not modulate TG in *PLCG2* KO iMG (n=3 independent experiment, two-tailed paired t-test, mean $\pm$ SEM). **(C)** Maximal respiration measured by Seahorse fatty acid oxidation kit is reduced in both *TREM2* KO and *PLCG2* KO iMG (n=3-4 independent experiment, two-tailed paired t-test, mean $\pm$ SEM). **(D)** ATV:TREM2 increased spare capacity measured by Seahorse fatty acid

202 oxidation kit (n=8 independent experiment, two-tailed paired t-test, mean±SEM). **(E)**  
203 ATV:TREM2 does not modulate maximal respiration or spare capacity in *TREM2* KO iMG  
204 (n=4 independent experiment, two-tailed paired t-test, mean±SEM). **(F)** ATV:TREM2  
205 does not modulate maximal respiration and spare capacity *PLCG2* KO iMG (n=4  
206 independent experiment, two-tailed paired t-test, mean±SEM). **(G)** RNAseq analysis of  
207 brain microglia isolated from hTREM2 tg; TfR<sup>mu/hu</sup> mice dosed with 10 mg/kg ATV:TREM2.  
208 GSEA for top pathways based on a p-value cutoff of 0.05 for up- or downregulated gene  
209 sets 1 day post ATV:TREM2 dose.

210

211

212

213 **SUPPLEMENTARY FIGURES**

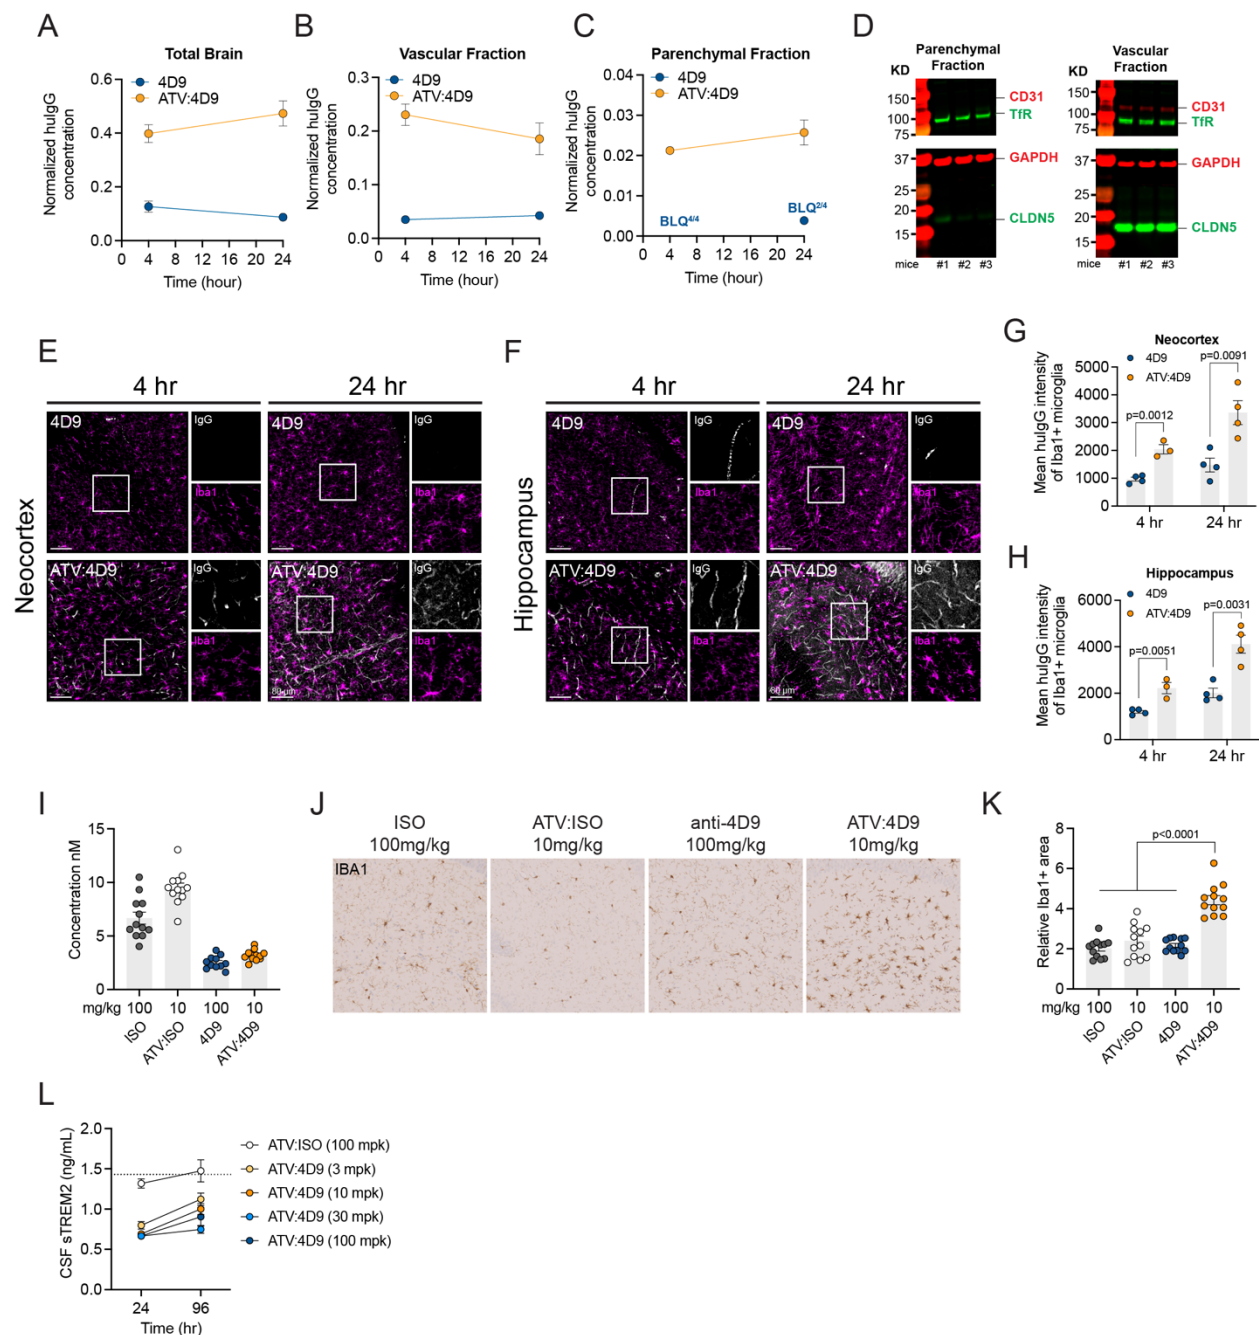

**Supplementary Figure 1. ATV improves delivery of a TREM2 antibody to the brain parenchyma, microglial co-localization and Iba1 response. (A-C)** 50 mg/kg of 4D9 and ATV:4D9 were administered IV TfR<sup>mu/hu</sup> mice and antibody concentrations were measured 4 and 24h post-dose by hulG ELISA assay in **(A)** total brain lysate, **(B)** brain

219 vasculature fraction, and **(C)** brain parenchymal cell fraction. Data were normalized to  
220 total protein used for each measurement. Samples with IgG levels below the limit of  
221 quantification (BLQ) are noted on the graph. All groups included n=4 mice, except for the  
222 4h 4D9 group in the vascular fraction (B, n=3). **(D)** Western blot demonstrating capillary  
223 depletion separated parenchymal and vascular cells. Endothelial cell markers CD31 and  
224 CLDN5 are shown with corresponding loading control TfR and GAPDH, respectively (1  
225 mouse per lane, n=3 are shown, uncropped blot is shown in Supplementary Figure 5) .  
226 **(E, F)** Representative confocal images showing co-localization of ATV:TREM2 in brain  
227 tissue sections immunostained for Iba1 and a secondary antibody against human IgG.  
228 Images were taken from equivalent fields within the **(E)** neocortex and **(F)** hippocampus.  
229 **(G, H)** Quantification of human IgG (hulgG) signal localized within Iba1<sup>+</sup> microglia.  
230 Individual microglia were segmented from confocal Z-stacks using Iba1 as a mask. The  
231 mean voxel intensity of hulgG was calculated by normalizing the sum intensity to the  
232 microglial volume from two image fields per sample. (n=4 mice/group except ATV-4D9-  
233 4hr (n=3), multiple unpaired-test, mean±SEM) **(I-K)** 6-week multi-dose study with  
234 equivalent ATV:4D9 and 4D9 brain exposure. **(I)** Antibody levels in brain are detected at  
235 comparable concentrations of ATV:4D9 (10 mg/kg) and anti-4D9 (100 mg/kg) 1 day post  
236 final dose (n=12 mice/group). **(J)** Representative images for Iba1 detected by IHC in brain  
237 after multi-dose of ATV:4D9, 4D9, or isotype controls. **(K)** ATV:4D9 but not 4D9 increases  
238 Iba1 area (n=12 mice/group, Brown-Forsythe and Welch ANOVA test compared to  
239 ATV:4D9 group, mean±SEM). **(L)** Soluble TREM2 is reduced in CSF (n=5 mice/group).

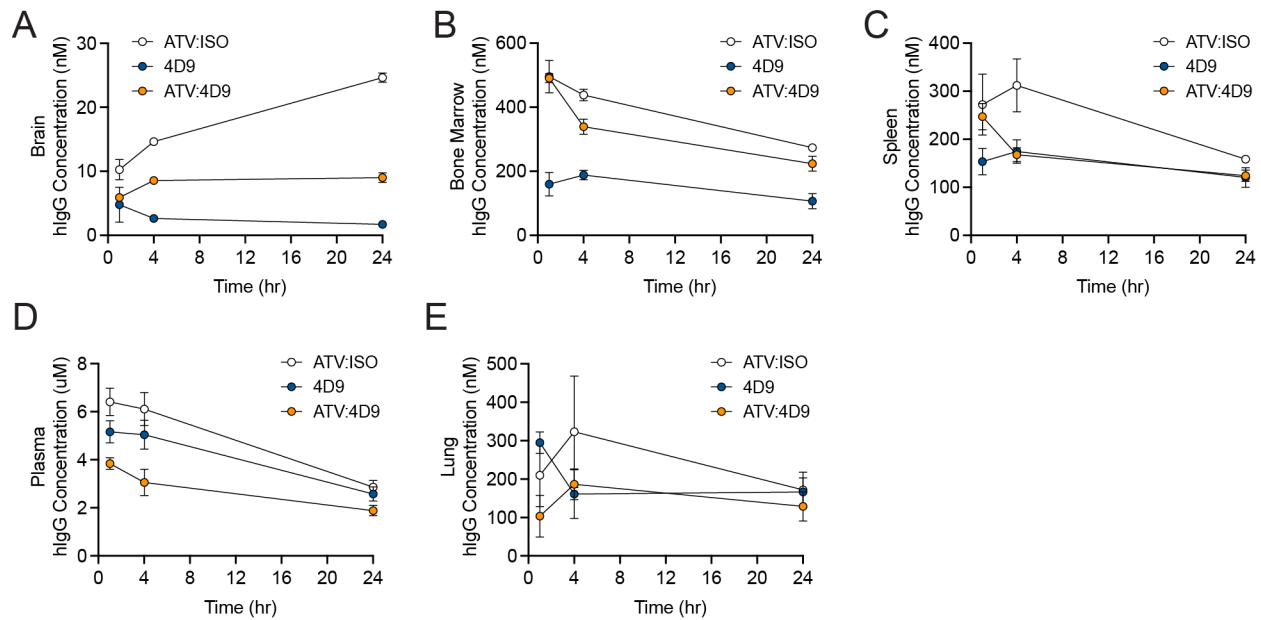

**Supplementary Figure 2. Peripheral biodistribution of ATV:4D9 in WT; TfR<sup>mu/hu</sup> mice.** 50mg/kg of ATV:4D9, ATV:ISO, and 4D9 were IV dosed in mice and tissues were collected and lysed at 1, 4, and 24h post dose. Antibody concentrations were quantified using an Fc:Fc sandwich ELISA (n=3-4 mice/group A-E). **(A)** ATV:4D9 and ATV:ISO are increased in the brain compared to 4D9. **(B)** Biodistribution to bone marrow was higher for ATV:4D9 and ATV:ISO relative to 4D9. **(C D, E)** Spleen, plasma, and lung concentrations were comparable across the three antibodies.



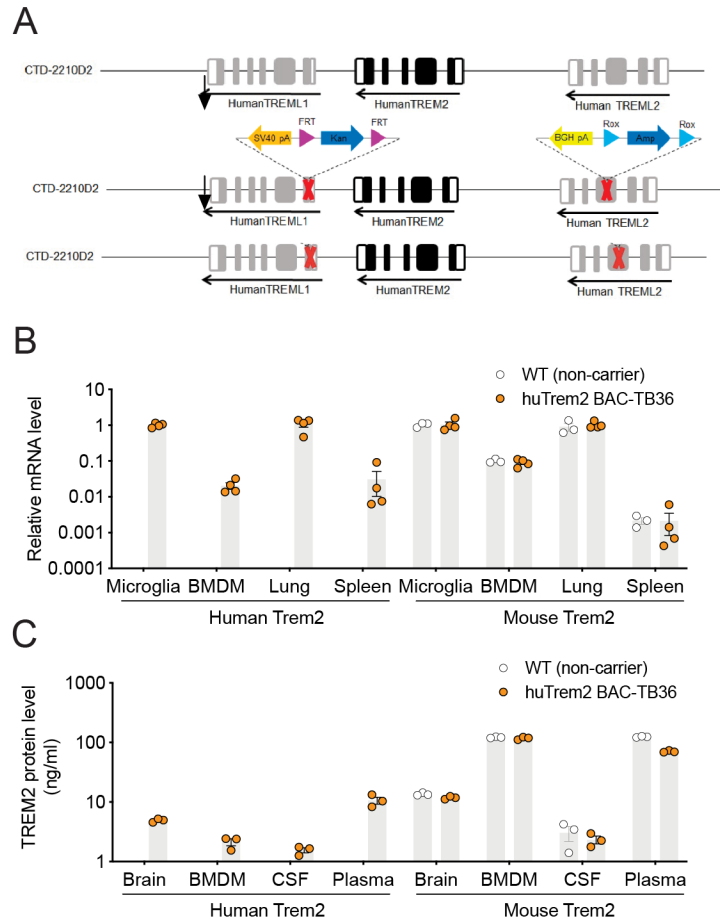

**Supplementary Figure 3: Generation of a human TREM2 BAC transgenic mouse model for *in vivo* characterization of ATV:TREM2.** (A) Diagram of genetic modifications to BAC CTD-2210D2. Human TREML1 exon 1 and TREML 2 exon 3 were replaced via homologous recombination by a SV40 pA Kan cassette and the BGH pA Amp cassette. TREML1 and TREML2 knockout was mediated by Kan cassette and the BGH pA Amp cassette deletion via FLP- and Dre-mediated recombination. The modified BAC CTD-2210D2 was used to generate the human TREM2 transgenic mouse model. (B) RT-qPCR analysis of human and mouse *Trem2* mRNA in microglia, bone marrow derived macrophages (BMDM), lung and spleen in human TREM2 tg mice and wild-type mice (n=3 miceWT/group, n=4 miceTREM2-BAC/group). (C) Human and mouse TREM2

proteins detected by MSD in brain, BMDM, CSF, and plasma in human TREM2 tg mice and wild-type mice (n=3 mice/group).

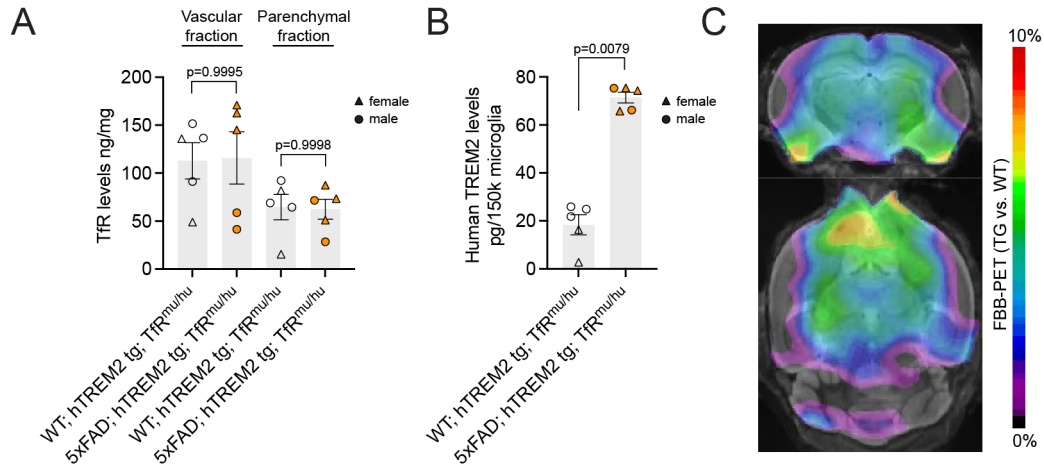

#### Supplementary Figure 4: Characterization of novel mouse models used in PET

**imaging studies. (A)** TfR protein levels were measured by MSD in vascular and

parenchymal brain fractions from WT; hTREM2 tg; TfR<sup>mu/hu</sup> or 5xFAD; hTREM2 tg;

TfR<sup>mu/hu</sup> mice (n=5 mice/group, Tukey's multiple comparisons test, mean±SEM). **(B)**

Human TREM2 protein levels were detected by MSD in isolated brain microglia from

WT; hTREM2 tg; TfR<sup>mu/hu</sup> or 5xFAD; hTREM2 tg; TfR<sup>mu/hu</sup> mice. A total of 150,000

microglia were enriched by FACS (n=5 mice/group, Mann Whitney test, mean±SEM).

**(C)** Regional alterations of [<sup>18</sup>F]florbetaben (FBB)-PET (cerebellar scaling, 30-60 min

p.i.) in an independent cohort of 5xFAD; hTREM2 tg; TfR<sup>mu/hu</sup> mice (n=4, 5 months old)

compared to an age-matched wild type cohort (n=27, C57BL/6, 5 months old).

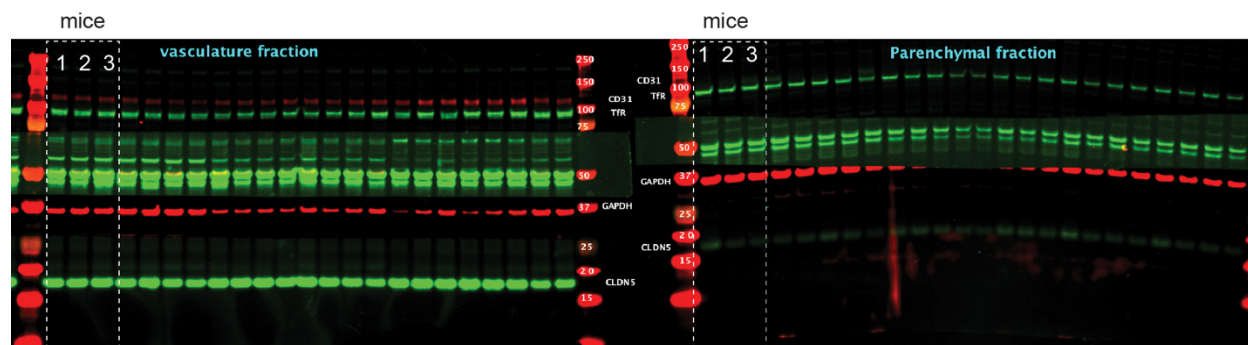

Related Supplemental Figure 1D

# **Supplementary Figure 5: Uncropped western blot image of capillary fractionation.**

Dotted box represents the cropped area used for Supplementary Figure 1D.

## SUPPLEMENTAL MATERIALS AND METHODS

### Microglia imaging analysis

Fluorescent stained sections were captured using a Zeiss Axioscan.Z1 slide scanner with a 10x/0.45 NA objective. A custom macro in Zeiss Zen software was used to quantify signal for EdU and Iba1 following median smoothing, channel extraction, and local background subtraction to create binary masks of fluorescent signal for each channel. Objects smaller than 10 pixels were excluded as staining artifacts/debris. The whole brain region was automatically outlined for each section and analyzed using the macro to measure the number and area of total microglia coverage (Iba1<sup>+</sup>) and newborn microglia (EdU<sup>+</sup> and Iba1<sup>+</sup>). The percentage Iba1<sup>+</sup> in the areas of interest were calculated by normalizing the positive pixel area to the quantified tissue area and averaged from 3 sections/animal.

To assess microglia morphology changes during ATV:4D9 treatment, confocal images of cortical regions of Iba1 stained mouse brain sections were acquired with a spinning disk confocal microscope (Zeiss AxioObserver Z1, Carl Zeiss Microscopy). A minimum of 3 regions per animal were imaged in 3 animals per treatment using a 40x/1.3 NA oil immersion objective at a pixel size of 333 nm x 333 nm. Confocal z-stacks of 15-30  $\mu$ m with a z-step size of 250 nm were acquired for each channel.

Microglia were initially segmented using a voxel U-net neural network pipeline<sup>2</sup> which was trained to simultaneously predict the location of the microglia cell body and soma from the Iba1 signal, down-sampled to approximately 1.0 x 1.0 x 1.0  $\mu$ m isotropic volume images. The microglia cell mask was accepted at a 90% confidence threshold, while the soma was accepted at 50% confidence. The cell mask was then separated into individual microglia by first splitting the mask into 4-connected components, then splitting each of

302 those components by distance to the nearest soma using a watershed segmentation<sup>3</sup>.  
303 The final cell masks were then up-sampled to full image resolution and refined using a  
304 restricted segmentation approach as follows. First, a core mask was calculated by eroding  
305 the initial cell mask twice, and a shell mask calculated by dilating the initial cell mask  
306 once. Next, the core voxels were assigned to the final mask, regardless of their Iba1  
307 intensity values. Finally, any voxels outside the core, but inside the shell inclusive were  
308 assigned to the final mask if they were above a manually determined Iba1 intensity  
309 threshold (4,000 AU for all images). Microglial morphology was analyzed using custom  
310 python code built on the tools in the scikit-image package<sup>3</sup> and the skan skeletal analysis  
311 package<sup>4</sup> (see “Code Availability” for detail). Specifically, geometric features such as  
312 volume, surface area, moments of inertia, and dimensionless ratios of these were  
313 calculated for the microglial volume, the convex hull of the microglial volume, and the  
314 axis-aligned bounding box of the microglial volume. Skeletal features were calculated by  
315 calculating the one-voxel thick morphological skeleton of the microglial volume, then  
316 using graphical analysis to calculate properties such as total number of branchpoints,  
317 branch length distributions, and numbers of total, short (less than 5  $\mu\text{m}$  long) and long  
318 branches (longer than 20  $\mu\text{m}$ ). Fractal features were calculated using a box-counting  
319 approach using 12 octaves of boxes that began at the resolution limit of the microglial  
320 surface and doubled in size with each octave, where several measures of each fractal  
321 feature were calculated using both log-linear regression coefficients and the average of  
322 the fractal value measured at each octave<sup>5</sup>. Sholl-like features were calculated using the  
323 soma segmentation where available, or a surface touching sphere centered on the center  
324 of mass of the microglia for microglia without a predicted soma but were extended to

325 calculate all features using concentric spherical shells around each soma as opposed to  
326 concentric circles, with all subsequent features measured in three dimensions as opposed  
327 to the typical two. Immunohistochemistry features were calculated by measuring the  
328 mean, median, standard deviation, and inner-quartile range of the signal within the total  
329 microglial volume, the microglial core, and the microglial surface. A full list of features  
330 measured for each microglia is given in Supplementary Table 6.

331 The 65 features for all microglia across all treatment conditions were concatenated into a  
332 single matrix, and each column was standardized using the QuantileTransformer in scikit-  
333 learn<sup>6</sup>. Microglia with volumes less than 500  $\mu\text{m}^3$  or more than 5,000  $\mu\text{m}^3$  were excluded  
334 as these were typically fragmented and multi-cell segmentations respectively. The feature  
335 matrix was projected onto 8 principal components which collectively explained >90% of  
336 the total variance. Uniform manifold approximation and projection (UMAP) was used to  
337 visualize the distribution of cells in PCA space, revealing two visible groupings of cells.  
338 K-means clustering was performed with between 2 and 10 clusters, where the peak  
339 silhouette score (0.8180) occurred at 2 clusters. To assign phenotypes to clusters, the  
340 fold change difference between the two clusters was calculated for each standardized  
341 feature, and all features with an FDR-corrected p value < 0.05 and an effect size (Cohen's  
342 d) > 0.2 were ranked in order of difference between the means. Top features  
343 representative of clusters 1 and 2 were examined by experts on glial biology and labels  
344 for the clusters assigned. Cells were then grouped by treatment, and the average  
345 percentage of each cell in each cluster for each treatment were compared to the control  
346 using a 1-way ANOVA followed by FDR corrected post-hoc tests.

## **Myelin debris and A $\beta$ fibrils preparation, fluorescent labeling for ex-vivo phagocytosis assay**

To isolate myelin debris, fresh adult mouse brain was chopped and homogenized with Lysis Buffer containing 10 mM HEPES, 5 mM EDTA, 0.32 M sucrose and protease inhibitors. Brain homogenate was transferred to ultracentrifuge tube (Beckman Coulter, 344060) and sequentially underlaid with equal amount of 0.32 M sucrose (10 mM HEPES and 5mM EDTA) and 0.85 M sucrose (10 mM HEPES and 5 mM EDTA) and then centrifuged at 75,000 x g for 30 min at 4°C with low deceleration and acceleration. Crude myelin was enriched from 0.32 M and 0.85 M sucrose interface and placed in a clean ultracentrifuge tube and washed twice with ice cold water and centrifuged at 75,000 x g for 15 min and 12,000 x g for 10 min at 4°C sequentially with max acceleration and deceleration. The water wash step was then repeated. Afterward the pellet was resuspended in lysis buffer and the whole process was repeated from the first underlay step. The final myelin pellet was resuspended in 1XPBS and tested for protein and cholesterol content. Myelin was diluted to 1 mg/ml and aliquoted and stored at -80°C before labeling.

Myelin was further labeled with pHrodo-green using the pHrodo iFL Green Microscale Protein Labeling Kit (Invitrogen, P36015). 100 ug of myelin was diluted in 100 uL of 1XPBS per labeling reaction. 10 uL of 1 M sodium bicarbonate and 2.5 uL of pHrodo iFL Green STP ester were added to each labeling reaction and incubated at RT for 30min. After 3 times wash with 1xPBS, the pHrodo-green labeled myelin was resuspended in 100ul 1XPBS and stored at -80°C for phagocytosis assay.

369 FAM-labelled A $\beta$  (1-42) peptides were purchased from Anaspec (AS23525-05). For  
370 preparation of aggregated fibrils, 0.5 mg of FAM-A $\beta$  was reconstituted in 100  $\mu$ L of DMSO  
371 then diluted by adding 1 mL of 1XPBS and incubated at 37°C for 1 day at 700rpm in an  
372 orbital shaker. The solution was then transferred to an ultracentrifuge tube (Beckman  
373 357488) and spun at 100,000 x g for 30 min at 4°C. The supernatant was discarded and  
374 the pellet was resuspended and washed with 1ml of 1XPBS 3 times. The final pellet was  
375 resuspended in 100  $\mu$ L of 1XPBS and stored at -80° C.

#### 376 **Human TREM2 antibody discovery**

377 Lewis Rats (Charles River Laboratories) were immunized with the recombinant TREM2  
378 protein (19-172aa) with a c-terminal His (x6)-tag bi-weekly over 5 weeks. Lymph nodes  
379 (brachial, axillary, inguinal, and popliteal) were collected from rats with significant TREM2  
380 titers. Cells from these tissues were isolated and enriched for plasma cells using flow  
381 cytometry. Enriched plasma cell suspension was injected into AbCellera Biologics Inc.'s  
382 microfluidic screening devices with over 90,000 individual nanoliter-volume reaction  
383 chambers (1-9). Single cells secreting TREM2-specific antibodies were identified and  
384 isolated using a cell-binding assay followed sequentially by a bead-binding assay (10-  
385 11). The cell-binding assay comprised HEK293 readout cells expressing human TREM2,  
386 HEK293F cells expressing mouse TREM2, and a HEK293 control cell line. The bead-  
387 binding assay comprised beads conjugated with human TREM2 recombinant protein. The  
388 readout cells and beads were flowed sequentially into microfluidic screening devices,  
389 incubated with single antibody-secreting cells, and mAb binding to cognate antigens was  
390 detected via a fluorescently labeled anti-rat IgG secondary antibody. Positive hits were  
391 identified using machine vision and recovered using automated robotics-based protocols.



## **Single-B-cell antibody sequencing and bioinformatic analysis**

Single cell polymerase chain reaction (PCR) and custom molecular biology protocols generated NGS sequencing libraries (MiSeq, Illumina) using automated workstations (Bravo, Agilent). Sequencing data were analyzed using a custom bioinformatics pipeline to yield paired heavy and light chain sequences for each recovered antibody-secreting cell (12). Each sequence was annotated with the closest germline (V(D)J) genes and degree of somatic hypermutation. Antibodies were considered members of the same clonal family if they shared the same inferred heavy and light V and J genes and had the same CDR3 length.

## **Recombinant antibody generation**

The standard IgG anti-TREM2 antibody containing the effector knock-out substitutions was generated by cloning the variable domains of the TREM2 antibody into the human IgG1 L234A/L235A (LALA), and human kappa chain expression vectors. To generate ATV:TREM2 in either bivalent or monovalent Fab format, the Fc domain was replaced by the engineered Fc sequence<sup>7</sup> with the LALA effector knock-out substitutions.

## **Antibody expression and purification**

Anti-TREM2 antibody, ATV:TREM2 and isotype controls were expressed via transient transfection of Expi293F cell line (RRID:CVCL\_D615, Thermo Fisher Scientific A14527) adapted to BalanCD HEK293 media (Irvine Scientific) according to manufacturer's instructions. Cultures were co-transfected with plasmids encoding for standard

monoclonal antibody (2-chain): 1:1 Heavy Chain (HC):Light Chain (LC) and antibody transport vehicle (ATV) molecule: 1:1:2 Knob:Hole:Light Chain (LC). Anti-TREM2 antibody, ATV:TREM2 and isotype controls were purified to homogeneity from serum-free BCD293 cultures by a series of chromatographic steps. Supernatants were loaded onto a 1x PBS equilibrated HiTrap MabSelect Prisma affinity column (Cytiva using an Akta Pure System), the column was then washed with 5 column volumes (CVs) of 1x PBS and 0.1% Triton X-100, followed by 10 CV of 1x PBS wash. Bound proteins were eluted using 0.1 M sodium citrate pH3.6 and 150 mM sodium chloride. Immediately after elution, Protein A eluate was neutralized to pH6.5 with 1M Tris pH8. Neutralized Protein A eluate was conditioned with 50mM sodium acetate pH6.5 prior cation-exchange chromatography. Use linear gradient with, 0.5M sodium chloride and 50mM sodium acetate pH6.5 to elute proteins from SP HP resin (Cytiva). Final fractions with a high degree of purity, as assessed by analytical size-exclusion chromatography (SEC) and/or microcapillary electrophoresis (Caliper), were pooled, concentrated and dialyzed into formulation buffer of 10mM sodium acetate pH5.5, 6% sucrose and/or 1x PBS for cell-based functional assay. Preparations were stored at 4°C or -80°C prior to use and routinely analyzed by SEC, SPR and for endotoxin content.

### **Affinity and binding kinetics**

Human TREM2 binding affinities of anti-TREM2 antibodies were determined by surface plasmon resonance using a BIAcore 8K instrument (GE Healthcare). Biacore Series S CM5 sensor chip was immobilized with a mixture of two monoclonal mouse anti-Fab antibodies (Human Fab capture kit from GE Healthcare) to capture antibodies for binding measurements. To measure TREM2 binding affinities of anti-TREM2 antibodies, serial 3-

435 fold dilutions of recombinant human TREM2 protein were injected at a flow rate of 30  
436  $\mu\text{L}/\text{min}$  for 300 seconds followed by 600 second dissociation in HBS-EP+ running buffer  
437 (GE, #BR100669). For human TfR binding affinity measurements, serial 3-fold dilutions  
438 of recombinant human TfR apical domain were injected for 60 seconds followed by 60  
439 seconds of dissociation. After each injection, the chip was regenerated using a 50mM  
440 glycine pH2.0 regeneration buffer. A 1:1 Langmuir model of simultaneous fitting of  $k_{\text{on}}$  and  
441  $k_{\text{off}}$  was used for kinetics analysis.

#### 442 ***In vitro* biochemical shedding blocking**

443 Full length -peptide "biotin-  
444 DPLDHRDAGDLWFPGESSEFEDAHVEHSISRSLLEGEIPFPPC-FAM" was custom  
445 synthesized by Elim Biopharm, Inc. Lyophilized peptides were resuspended in DMSO as  
446 1 mM stock solution and further diluted to 1  $\mu\text{M}$  working solution in FP assay buffer  
447 containing 25 mM Tris (Neknova, T5080), 2.5  $\mu\text{M}$   $\text{ZnCl}_2$  (Acros organics, 196840010),  
448 0.005% Brij-35 (Thermofisher Scientific, 20150) and adjusted to pH 7.5 with hydrochloric  
449 acid (Fisher chemical, SA431-500). A reaction mixture containing FL-peptide,  
450 streptavidin, and testing antibodies were pre-mixed in FP assay buffer and incubated at  
451 room-temperature for 30 min. Reconstituted ADAM17/TACE enzyme solution (R&D  
452 systems, catalog #930-ADB-010) was then added to the mixture that has a final  
453 concentration of 20 nM FL-peptide, 0.1 mg/mL Streptavidin (Thermofisher Scientific,  
454 21125), 200 nM testing antibodies, and 25  $\mu\text{g}/\text{mL}$  ADAM17/TACE enzyme in 20  $\mu\text{L}$   
455 reaction volume. The reaction mixture was incubated at 25°C for 24 h. The pan matrix  
456 metalloproteinases inhibitor GM6001 (Adooq Bioscience, A13320-50) was used at 50  $\mu\text{M}$   
457 in the assay reaction. No enzyme control representing theoretical 0% cleavage was setup

the same way as assay reaction without the addition of ADAM17/TACE. Short-peptide “SISRSLLERGEIPFPPC-FAM” which corresponds to the cleaved fragment was used as control for 100% cleavage. Short-peptide control was diluted in FP assay buffer to have 20 nM final concentration. 10 µL reaction product was diluted with 190 µL FP assay buffer. 30 µL of the diluted reaction was transferred to a 384-well assay plate (Corning, catalog #3575) and measured by a plater reader equipped with FP Fluorescein Dual detector (Perkin Elmer, EnVision, serial # 1041585). The mP value was computed by the EnVision Workstation software (Version #1.14.3049.528) and further analyzed in R Studio and GraphPad Prism. Raw FP signal (mP value) with technical repeats was averaged for each experiment. A total of 4 independent experiments were performed. Percent peptide cleaved was calculated based on **Equation 1**:

$$\% \text{ peptide cleaved} = 100\% - \frac{X - FP_{min}}{FP_{max} - FP_{min}} \quad [\text{Equation 1}]$$

$X$ ,  $FP_{min}$ ,  $FP_{max}$  represents FP value measured from experimental group, short-peptide control, and no enzyme control, respectively. Unpaired t-test were used to compare statistical differences between groups.

## **RNA sequencing in isolated mouse brain microglia**

### *Sample Preparation*

Mice were perfused with cold PBS and cortical and hippocampal tissues were dissected and dissociated into a single cell suspension using the Adult Brain Dissociation Kit (Miltenyi Biotec 130-107-677), according to the manufacturer’s protocol.

481 *scRNA-seq library preparation in WT mice*

482 Single cell suspensions were enriched for immune cells via MACS sorting with Miltenyi  
483 CD45 microbeads, mouse (Miltenyi Biotec, 130-052-301). Single cell suspensions were  
484 prepared in 3 batches, each batch containing one sample of each experimental group.  
485 Sorted cells were subjected to droplet-based single-cell RNA sequencing using the  
486 Chromium Single Cell 3' GEM, Library & Gel Bead Kit v3 per the manufacturer's  
487 instructions (10x Genomics, CG000183 Rev B) targeting a recovery of 10,000 cells per  
488 sample. Next-generation sequencing was performed by SeqMatic (Fremont, CA) on an  
489 Illumina NovaSeq instrument with a S2 flow cell generating paired-end reads (28x8x90  
490 bases).

491 *scRNA-seq library preparation in AD mouse model*

492 Four batches of single cell suspensions, with one replicate of each condition, were labeled  
493 with CD11b (BioLegend 101251) and CD45 antibody (BD Biosciences 559864) and cell  
494 multiplex oligos per user guide (10X Genomics, CG000391 Rev A). After 3-4 washes at  
495 500 x g for 5 minutes in 4C, cells were filtered through a 30 µm strainer and counted  
496 manually on a hemocytometer. Equal proportions of cells from each sample were  
497 combined into one pool per batch and 100,000 live, CD11b+ cells were FACS sorted on  
498 FACS Aria III (BD Biosciences with a 100 µm nozzle) into 1% BSA in PBS. The  
499 multiplexed pool was counted on a hemocytometer after centrifugation at 200 x g for 10  
500 minutes in 4C to pellet cells and remove excess liquid leaving behind enough volume for  
501 a loading concentration of 1000-2000 cells/µL. Single cell capture and library preparation  
502 was performed using Chromium Next GEM Single Cell 3' Kit v3.1 per user guide (10X  
503 genomics, CG000388 Rev A). After cDNA amplification of RT materials from captured

cells, transcriptional cDNA was separated from cell multiplex oligo cDNA via NucleoMag bead purification (Takara, 7444970.50), proceeded by library preparation of both sets of cDNA. Transcriptional libraries were pooled in equimolar for a sequencing run on an Illumina MiSeq instrument to estimate the number of cells captured in each library. This MiSeq capture information was used to pool libraries in equal proportions for similar sequencing coverage of 50,000 reads per cell across libraries and 5000 reads per Cell multiplex oligo. Sequencing on the Illumina NovaSeq 6000 instrument generating paired-end reads (28x10x10x90 bases) was performed by SeqMatic (Fremont, CA).

#### *Sample-level data processing, QC, and filtering*

Sample demultiplexing, alignment, and per-barcode expression quantification, and empty droplet detection was performed against *mus musculus* genome mm10 using Cell Ranger (v7.0.0 for WT study; v6.1.1 for AD study) using default parameters. For the WT study, the “cellranger count” pipeline was used. For the AD study, the “cellranger multi” pipeline was used to perform cell multiplex hash demultiplexing. Low quality droplets were further filtered based on 3 criteria: total number of genes detected (nFeature), total numbers of UMIs, and percentage of counts mapping to mitochondrial genes. For WT study, cutoffs of  $\geq 500$  nFeature,  $\leq 25000$  UMIs, and  $\leq 10\%$  mitochondrial reads were used. For the AD study, cutoffs of  $\leq 60000$  UMIs and  $\leq 7.5\%$  mitochondrial reads were used. Individual objects were generated for each study by combining all samples within each sequencing batch and then using the integration pipeline in the Seurat v4<sup>8</sup>. Batches were integrated to remove batch effects using the “FindAnchors” and “IntegrateData” functions. Following integration, data normalization, data scaling, PCA, UMAP projection, and unbiased clustering were performed to identify and exclude non-microglial cell types based on

marker gene expression. These steps were carried out using the “NormalizeData”, “ScaleData”, “FindVariableFeatures”, “ScaleData”, “RunPCA”, “RunUMAP”, “FindClusters”, and “FindAllMarkers” functions in the “Seurat” package, respectively<sup>9-13</sup>.

### *Bioinformatic Analysis*

Combined analysis was performed using the standard Seurat v4 workflow. To reduce the total size of the data object, a random sample of 5000 cells was taken from each experimental group in Study 1 for use in the combined analysis. The two studies were then combined using the “FindAnchors” and “IntegrateData” functions in the “Seurat” package to remove study-specific effects on dimensionality reduction and clustering. Data were then normalized using “NormalizeData.” The top 2000 variable genes excluding those commonly thought of as being associated with dissociation stress<sup>14</sup> were used to perform PCA using “RunPCA.” The top 9 principal components were used to perform UMAP dimensionality reduction, shared nearest neighbor graph construction, and Louvain clustering (“RunUMAP”, “FindNeighbors”, “FindClusters”). For differential expression analysis, pseudobulk libraries were generated by summing counts across samples:clusters using the “AggregateAcrossCells” function in the “scuttle” package<sup>15</sup>. Differential expression was then performed using the limma/voom workflow<sup>16</sup>. A linear model was fit for each gene to find genes that differed between clusters with the “study” added to the model as a fixed effect. GSEA for each cluster was performed using the “fgsea” and “sparrow” packages<sup>17</sup> (<https://github.com/lianos/sparrow>) with the moderated t-statistic from differential expression testing vs the “Homeostatic” cluster used as the gene ranking statistic. Gene sets for GSEA were taken from the hallmark gene sets in the Molecular Signatures Database (MSigDB)<sup>18</sup>.

## **RNAseq of iMG dosed with ATV:TREM2 or other stimuli**

iMG were plated at 30,000 cells/well in microglia differentiation media (see below) on 96-well Cell Carrier Ultra plates and allowed to adhere for 3 days. Subsequently, media was exchanged for microglia differentiation media diluted 1:3 with microglia differentiation media without growth factors and treated with 100nM ATV:ISO or ATV:TREM2, or 10 ng/mL LPS (Sigma L2880), 20 ng/mL TGFb (RnD 7754-BH), or 20 ng/mL IFNg (RnD 285-IF/CF). After 4 days of treatment, RNA was extracted using the RNeasy Plus Micro Kit (Qiagen, 74034). RNA quality was assessed with a RNA 6000 Pico chip (Agilent 5067-1513) on a 2100 Bioanalyzer (Agilent) and quantified with Qubit RNA HS Assay Kits (Life Technologies, Q32855).

## **Bulk RNA-seq library preparation of iMG**

Bulk RNA-seq libraries were generated using QuantSeq 3' mRNA-seq Library Prep Kit FWD for Illumina (Lexogen A01173) with the UMI second strand synthesis module in order to identify and remove PCR duplicates, following the protocol defined by the manufacturer. Library quantity and quality were assessed with Qubit™ 1X dsDNA HS Assay Kits (Invitrogen Q33231) and Bioanalyzer High Sense DNA chip (Agilent 5067-4626). Libraries were combined in equimolar ratios into one sequencing pool. Next-generation sequencing of 75 bp, single end reads were generated on an Illumina NovaSeq instrument with a SP flow cell at SeqMatic (Fremont, CA).

## **Bulk RNA-seq data processing and analysis**

Raw FASTQ files were aligned to the genome using the STAR aligner<sup>19</sup> and summarized into gene-level counts using *featureCounts* from the *subread* package<sup>20</sup> as previously described<sup>21</sup>. Lowly expressed and non protein-coding genes were removed, and



differential expression analysis was performed using the limma/voom pipeline<sup>22</sup>. Linear models were constructed to identify genes differentially expressed between the groups of interest. “Takedown day” was encoded as a fixed effect to account for potential technical artifacts induced by processing animals on different days. We used gene set enrichment analysis (GSEA) to summarize individual differential gene expression results at the pathway/signature level<sup>17</sup>. Gene sets were taken from the hallmark molecular signature database<sup>18</sup>. GSEA statistics were generated using the fgseaMultiLevel function in the fgsea R package using the moderated t-statistic as the gene ranking statistic<sup>17</sup>. Gene set definitions and GSEA statistics for all comparisons are provided in Supplementary Table 4. All software versions for the RNA-seq analysis correspond to Bioconductor release version 3.13<sup>23</sup>. Individual genes were selected to show pathway activity in the Fig. 3K and Fig. 5M heatmaps by extracting the top 10-20 genes found in the “leading edge” of each pathway when ranked by their individual t-statistics.

## **Generation and cell culture of human iPSC-derived microglia**

### *Hematopoietic Differentiation*

Human iPSCs (RRID:CVCL\_D086, Gibco A18945) were maintained in mTESR-Plus (Stemcell Technologies #100-0276) until seeding for differentiation. At ~80% confluence, cells were singularized with TrypLE Express (ThermoFisher #12604013) for five minutes and mechanically dissociated with a P1000 tip using mTeSR-Plus and transferred to a 15 mL conical tube, and pelleted at 300 x g for five minutes. Cells were resuspended in mTeSR-Plus and counted using a Nexcelom cellometer and seeded into mTeSR-Plus + 10uM y-27632 (Tocris, 1254) at 13,200 cells/cm<sup>2</sup> (approximately 50,000 cells per well of a 12-well tissue culture plate). All media used for hematopoietic differentiation was from

596 Stemcell Technologies STEMdiff Hematopoietic Kit (#05310). On day 0 mTeSR-Plus+y-  
597 27632 was aspirated and replaced with 1.0 mL medium A. On day 2 0.5 mL medium A  
598 was removed from each well and 0.5 mL fresh medium A was added. On day 3 all medium  
599 A was removed from each well and fresh medium B was added. On day 3 primary human  
600 astrocyte feeder cells were thawed and seeded into poly-L-Lysine coated 10cm<sup>2</sup> tissue  
601 culture dishes using Lonza AGM (CC-3186) as growth medium. This is done so cells are  
602 ready to serve as feeder cells by day 12. On days 5 and 7 0.5 mL medium B is removed  
603 from each well and 0.5 mL fresh medium B is added back to the well. On day 8 primary  
604 human astrocytes were dissociated using 0.05% Trypsin-EDTA (ThermoFisher,  
605 25300062) counted in the Nexcelom cellometer and seeded at 10,000 cells/cm<sup>2</sup>  
606 (approximately 100,000 cells per well of a 6-well tissue culture plate was used). On day  
607 9 no medium was removed, but 0.5mL medium B was added to each well. On day 10  
608 floating colonies of hematopoietic progenitor cells (HPCs) were visible and collected. To  
609 collect the cells, medium from each well was collected and added to a 15 mL conical tube.  
610 Cells were briefly mechanically dissociated with a serological pipet and tubes were  
611 transferred to the centrifuge and pelleted at 300 x g for five minutes. 0.5 mL fresh medium  
612 B was added to each well of the 12-well plate. After pelleting HPCs, 0.5 mL of conditioned  
613 medium from each tube was added back to each well of the 12-well plate and the plate  
614 was returned to the incubator. Any remaining medium in the conical tube was then  
615 aspirated and HPCs were resuspended in microglia differentiation medium (IMDM base  
616 medium containing 10% FBS, and 20ng/mL each of GM-CSF (Peprotech, AF-300-03),  
617 IL3 (Peprotech, AF-200-03), and M-CSF (Peprotech, AF-30-25). AGM was aspirated from  
618 the astrocyte feeder cell plates and HPCs collected from an entire 12-well plate were

seeded evenly across 2, 6-well plates containing astrocyte feeder cells (bring total microglia differentiation medium volume to 2 mL/well). On day 12 the same steps from Day 10 were repeated and the cells were seeded evenly across the same 6-well plates already containing HPCs and astrocyte feeder cells (each well now contains 4 mL/well). After one week of culture numerous cells are seen proliferating in suspension with some firmly attaching to astrocyte feeder cells. *Note:* A small fraction of HPCs was collected at day 10 and day 12 to ensure that at least 80% of cells are CD43<sup>+</sup> by flow cytometry analysis.

#### *Microglia Differentiation and Maintenance*

On day 20 2 mL medium was collected from each well and suspension cells were pelleted at 300 x g for five minutes. Medium was aspirated and pelleted cells were resuspended in 24 mL microglia differentiation medium (see above) and 2 mL of the cell suspension was added back to each well. This process is repeated ~ every 5 days as needed to maintain a consistent pH in the medium (phenol red indicated). By day 42 cells were harvested and seeded in an assay dependent manner.

#### **Small animal PET/MRI**

All rodent PET procedures followed an established standardized protocol for radiochemistry, acquisition times and post-processing<sup>24</sup>, which was transferred to a novel PET/MRI system<sup>25</sup>. All mice were scanned with a 3T Mediso nanoScan PET/MR scanner (Mediso Ltd, Hungary) with a triple-mouse imaging chamber. Two 2-minute anatomical T1 MR scans were performed prior to tracer injection (head receive coil, matrix size 96 × 96 × 22, voxel size 0.24 × 0.24 × 0.80 mm<sup>3</sup>, repetition time 677 ms, echo time 28.56 ms, flip angle 90°). Injected dose was 12.3 +/- 2.2 MBq for [<sup>18</sup>F]GE-180 (TSPO) and 14.5 +/-

642 3.4 MBq [ $^{18}\text{F}$ ]FDG (glucose) delivered in 200  $\mu\text{l}$  saline via venous injection. PET emission  
643 was recorded in a dynamic 0-90 min window for TSPO PET and in a dynamic 0-60 min  
644 window for FDG PET. List-mode data within 400-600 keV energy window were  
645 reconstructed using a 3D iterative algorithm (Tera-Tomo 3D, Mediso Ltd, Hungary) with  
646 the following parameters: matrix size  $55 \times 62 \times 187 \text{ mm}^3$ , voxel size  $0.3 \times 0.3 \times 0.3 \text{ mm}^3$ ,  
647 8 iterations, 6 subsets. Decay, random, and attenuation correction were applied. The T1  
648 image was used to create a body-air material map for the attenuation correction.

649 We studied PET images of WT; hTREM2 tg; TfR<sup>mu/hu</sup> mice and 5xFAD; hTREM2 tg;  
650 TfR<sup>mu/hu</sup> mice (n=6 per antibody and placebo group). Framing was 6x10s, 6x30s, 6x60s,  
651 10x300s for FDG-PET and 6x10, 2x30, 3x60, 5x120, 5x300, 5x600 for TSPO-PET.

652 Normalization of TSPO PET data was performed by the previously validated myocardium  
653 correction method for the previously established 60-90 min time window<sup>26,27</sup>, after cross  
654 validation against volume of distribution ( $V_T$ ) images obtained from the full dynamic scan.

655 We generated  $V_T$  images with an image derived input function<sup>28,29</sup> using methodology as  
656 previously described<sup>30</sup>. The plasma curve was obtained from a standardized bilateral VOI  
657 placed in both carotid arteries. A maximum error of 10% and a  $V_T$  threshold of 0 were  
658 selected for modelling of the full dynamic imaging data. Late static myocardium corrected  
659 TSPO-PET data were used and reported due to less methodological variance, which was  
660 proven to be beneficial in serial small animal PET imaging<sup>26</sup>. Normalization of FDG-PET  
661 was performed by standardized uptake values (SUVs), reflecting the common read-out in  
662 clinical setting. Blood-flow adjusted validation of FDG-PET quantification was performed  
663 by a simplified reference tissue modeling approach, using the periaqueductal grey as an  
664 established reference tissue<sup>31</sup>. The reference tissue was validated by analyzing antibody

and vehicle injected mice using  $V_T$  images as described above which confirmed no  $V_T$  differences between study groups between groups in the periaqueductal grey. A predefined forebrain volume-of-interest (comprising 19.4 mm<sup>3</sup>) was delineated by cortical, striatal and hippocampal regions of the Mirrione atlas<sup>32</sup> and served for extraction of TSPO-PET and FDG-PET values for all mice.

An independent cohort of age-matched 5xFAD; hTREM2 tg; TfR<sup>mu/hu</sup> mice (n=4) received [<sup>18</sup>F]florbetaben  $\beta$ -amyloid-PET imaging (13.3 +/- 1.0 MBq, 30-60 min p.i.) to obtain the 3-dimensional pattern of fibrillar amyloidosis for the acute dosing study. Cerebellar scaled images of 5xFAD; hTREM2 tg; TfR<sup>mu/hu</sup> mice were compared to an age-matched in-house cohort of n=27 C57BL/6 wild type mice with equivalent acquisition and normalization. Regional alterations (%) of the amyloid-PET signal in both mouse models were determined in all regions of interest of the Mirrione atlas. Similarly, regional alterations of TSPO-PET (SUV<sub>H</sub>) and FDG-PET (SUV) in ATV:TREM2 versus isotype control treated 5xFAD; hTREM2 tg; TfR<sup>mu/hu</sup> mice were determined at day 8 and a correlation analysis was performed to test if ATV:TREM2 treatment changes in TSPO-PET and FDG-PET correlate with the regional detection of amyloidosis.

#### **Twelve-week repeat dose study in WT; TfR<sup>mu/hu</sup> mice**

ATV:4D9, 4D9, and vehicle were dosed via intraperitoneal injections once a week for 12 weeks (13 total doses) to WT; TfR<sup>mu/hu</sup> mice with 10 mg/kg in each group. Necropsy was performed after euthanization by exsanguination from the abdominal aorta after isoflurane anesthesia 1 day after the final dose. Histopathological analyses were performed according to standard procedures.

#### **Biodistribution of ATV:4D9 and ATV:TREM2**

688 To determine the biodistribution of ATV:4D9, WT; TfR<sup>mu/hu</sup> mice were IV dosed with a  
689 single dose of 50 mg/kg of ATV:4D9 or ATV:ISO or 4D9. Plasma, brain, lung, liver, spleen,  
690 and bone marrow was collected at 1, 4, and 24 h post-dose to quantify hulG  
691 concentrations. To determine the biodistribution of ATV:TREM2, WT; hTREM2 tg;  
692 TfR<sup>mu/hu</sup> mice were IV dosed with a single, high dose of 50 mg/kg of anti-TREM2 or  
693 ATV:TREM2 to maximize signal to noise and tissues were collected at 4 h or 24 h post-  
694 dosing for evaluation of hulG concentrations in brain and capillary depletion fractions  
695 and hulG localization in brain using immunohistochemistry. N=3-4 mice were included  
696 per treatment group and time point.

#### 697 **Liquid chromatography-mass spectrometry (LCMS) analysis**

698 Lipid levels were analyzed by liquid chromatography (Shimadzu Nexera X2 system,  
699 Shimadzu Scientific Instrument, Columbia, MD, USA) coupled to electrospray mass  
700 spectrometry (QTRAP 6500+, Sciex, Framingham, MA, USA). For each analysis, 5 µL  
701 of sample was injected on a BEH C18 1.7 µm, 2.1×100 mm column (Waters Corporation,  
702 Milford, Massachusetts, USA) using a flow rate of 0.25 mL/min at 55°C. For positive  
703 ionization mode, mobile phase A consisted of 60:40 acetonitrile/water (v/v) with 10 mM  
704 ammonium formate + 0.1% formic acid; mobile phase B consisted of 90:10 isopropyl  
705 alcohol/acetonitrile (v/v) with 10 mM ammonium formate + 0.1% formic acid. For negative  
706 ionization mode, mobile phase A consisted of 60:40 acetonitrile/water (v/v) with 10 mM  
707 ammonium acetate; mobile phase B consisted of 90:10 isopropyl alcohol/acetonitrile (v/v)  
708 with 10 mM ammonium acetate. The gradient was programmed as follows: 0.0–8.0 min  
709 from 45% B to 99% B, 8.0–9.0 min at 99% B, 9.0–9.1 min to 45% B, and 9.1–10.0 min at  
710 45% B. Electrospray ionization was performed in either positive or negative ion mode

711 applying the following settings: curtain gas at 30; collision gas set at medium; ion spray  
712 voltage at 5500 (positive mode) or 4500 (negative mode); temperature at 250°C (positive  
713 mode) or 600°C (negative mode); ion source Gas 1 at 50; ion source Gas 2 at 60. Data  
714 acquisition was performed using Analyst 1.6.3 (Sciex) in multiple reaction monitoring  
715 mode (MRM), with the following parameters: dwell time (msec) and collision energy (CE);  
716 declustering potential (DP) at 80; entrance potential (EP) at 10 (positive mode) or -10  
717 (negative mode), and collision cell exit potential (CXP) at 12.5 (positive mode) or -12.5  
718 (negative mode). Lipids were quantified using a mixture of non-endogenous internal  
719 standards. Lipids were identified based on their retention times and MRM properties of  
720 commercially available reference standards (Avanti Polar Lipids, Birmingham, AL, USA).

#### 721 **pSyk activity with lipid ligand (liposome) co-stimulation**

722 Liposome preparation: Liposomes were prepared as follows: 7 mg DOPC (1,2-dioleoyl-  
723 *sn*-glycero-3-phosphocholine, Avanti 850375) and 3 mg POPS (1-palmitoyl-2-oleoyl-*sn*-  
724 glycero-3-phospho-L-serine, Avanti 840034), were combined in chloroform in a glass vial  
725 and dried under a stream of N<sub>2</sub> gas for 1h. The lipid mixture was re-suspended in 1 mL  
726 PBS (10 mg/mL final lipid concentration) and vortexed for 2-3 min until lipids were in  
727 solution, then extruded to form small unilamellar vesicles using an Avanti mini-extruder  
728 (Avanti 610023) containing a 100 nm membrane. Cells were plated on PDL-coated 96-  
729 well plates. After 24 h at 37°C, the media was removed and cells were washed once with  
730 PBS. Cells were dosed with 100 nM ATV:TREM2 antibody (or isotype control) pre-mixed  
731 with liposomes (1 mg/mL final concentration in PBS), or antibody in PBS. Cells were  
732 incubated for 5 min at 37°C, and lysed in CST (Cell Signaling Technology, 9803) lysis

733 buffer containing 1 mM PMSF (phenylmethylsulfonylfluoride, Sigma Aldrich). Lysates  
734 were assessed for pSyk levels using AlphaLisa.

735 **Super-resolution microscopy and quantification of TMRE-stained iMG dosed with**  
736 **ATV:TREM2**

737 iMG (20,000 cells/well) were seeded on PDL-coated 96-well Agilent Seahorse XF Cell  
738 Culture microplate in microglia differentiation media. After 24 h, media was changed to  
739 fresh microglia differentiation media containing 100 nM ATV:TREM2 or ATV:ISO. Cells  
740 were incubated for 3 days, then media was removed and replaced with Live Cell Imaging  
741 Solution (Invitrogen, A14291) containing 10 nM TMRE (Abcam, ab113852) for 20 min.  
742 Cells were then washed once with Live Cell Imaging Solution, then imaged with a laser  
743 scanning confocal microscope (Leica SP8; Leica Microsystems, Inc), acquired with a  
744 40x/1.3 NA oil objective in LIGHTNING super-resolution mode at a pixel size of 36 nm  
745 and images were processed using an adaptive processing algorithm. The representative  
746 images were generated by three-dimensional reconstruction in Imaris (Bitplane, V9.9.1).  
747 To identify different classes of mitochondrial morphology, we segmented individual  
748 mitochondrial surfaces by thresholding on the TMRE fluorescence intensity.  
749 Morphological classes were defined by using object volume and the long axis of the  
750 object-oriented bounding box and assigning classes for punctate, elongated and  
751 networked mitochondria.

752 To calculate the effects of ATV:TREM2 on TMRE intensity, cells were also co-incubated  
753 with NucBlue (1 drop/mL) during the TMRE incubation, and cells were washed once with  
754 Live Cell Imaging Solution and imaged using high-content microscopy (Opera Phoenix)  
755 to obtain intensity measurements per cell on 3000-4000 cells per experimental replicate.



## **Octet binding of antibodies to Fc gamma receptors**

ATV TREM2 and ATV ISO mAbs to human Fc gamma receptors, (ACRO biosystems Fc gamma RI #FCA-H82E8, RIIA #CDA-H82E5, RIIB #CDB-H82E0), binding affinities were determined by Biolayer Interferometry using an OCTET RED 384 instrument. In order to measure ATV TREM2 and ATV ASO binding affinities to each biotinylated Fc gamma receptors, biotinylated human Fc gamma receptors were immobilized onto SA-coated sensor probes (Sartorius, #185019) at a 2ug/mL concentration at a shaking speed of 1000 rpm. Fc gamma receptor-immobilized sensor probes were then plunged into increasing concentrations (0 nM to 4000 nM) of ATV TREM2 or ATV ASO diluted in 1X Kinetics buffer (Sartorius, #18-1105) for 900 seconds followed by 300 second dissociation in a blank 1X Kinetics Buffer. A 1:1 Langmuir model of simultaneous fitting of  $k_{on}$  and  $k_{off}$  was used for antigen binding kinetics analysis.

## **Epitope mapping by hydrogen deuterium exchange**

The epitope of the recombinant human TREM2 targeted by the anti-TREM2 antibody was determined by HDX-MS at NovaBioAssays (Woburn, MA). Briefly, the recombinant human TREM2 was mixed with anti-TREM2 Fab in a deuterium oxide labeling buffer (50 mM sodium phosphate, 100 mM sodium chloride at pH 7.0) and incubated for 0 s, 60 s, 600 s, and 3600 s at 20°C. Hydrogen/deuterium exchange was quenched by adding 4 M guanidine hydrochloride, 0.85 M TCEP buffer (final pH at 2.5). Then, the mixture was subjected to on-column pepsin/protease XIII digestion using a pepsin/protease XIII column (2.1 x 30 mm). The resultant peptides were analyzed using an UPLC-MS system comprised of a Waters Acquity UPLC coupled to a Q Exactive<sup>TM</sup> HF Hybrid Quadrupole-Orbitrap Mass Spectrometer (Thermo). The peptides were separated on a 50 mm x 1 mm

779 C8 column. Peptide identification was done by searching MS/MS data against the human  
780 TREM2 sequence with Mascot. Raw MS data was processed using HDX WorkBench  
781 software for the analysis of H/D exchange MS data (J. Am. Soc. Mass Spectrom. 2012,  
782 23 (9), 1512-1521). The deuterium levels were calculated using the average mass  
783 difference between the deuterated peptide and its native form.

#### 784 **Epitope mapping of ATV:TREM2 by peptide tiling**

785 Peptide ELISAs to detect TREM2 antibody binding to tiled stalk region peptides were  
786 performed as previously described<sup>33</sup> except using human peptides.

#### 787 **Detection of TREM2 antibody cell binding by flow cytometry**

788 hTREM2-DAP12 HEK293 cells, cTREM2-DAP12 HEK293 cells, and parental HEK293  
789 cells expressing GFP were harvested by 0.05% trypsin and incubated at 37C for 2 hours.  
790 After incubation, cells were centrifuged and resuspended in PBS with Trypan Blue for 10  
791 min. After staining, all cells were centrifuged and washed in FACS buffer (PBS + 0.5%  
792 BSA) twice. Mixed cells were resuspended in FACS buffer at a density of 10<sup>6</sup> cells/mL  
793 per cell line. The mixed cell lines were seeded at 100,000 cells per well in a 96-well v-  
794 bottom plate and incubated for 20 min at room temperature. After incubation, the cells  
795 were centrifuged and incubated with ATV:TREM2 or ATV:ISO in a dose titration from 0-  
796 300 nM for 45 min on ice. After incubation, cells were centrifuged and washed with FACS  
797 buffer three times. The cells were then incubated with secondary antibody (Alexa Fluor  
798 647 AffiniPure F(ab')<sub>2</sub> Fragment Goat Anti-Human IgG (H+L), Jackson ImmunoResearch  
799 Laboratories, Catalog No. 109-606-088, 1:800 dilution) for 30 min on ice without exposure  
800 to light. After incubation, the cells were washed with FACS buffer three times,  
801 resuspended in 100 µL of FACS buffer, and analyzed by flow cytometry (BD FACSCanto

802 II, San Jose, CA), for which 50,000 events were obtained for each sample. Mean  
803 fluorescence intensity per cells were calculated by FLOWJO software and used for  
804 generation dose response binding curve.

#### 805 **iMG FACS analysis**

806 50K WT iMG cells per sample were resuspended in 1X FACS buffer containing 1X PBS,  
807 1% BSA, 1 mM EDTA. Cells were then incubated with 5 uL anti-Fc blocker (Biolegend,  
808 422301) per 100 uL sample for 20 min on ice. Cells were then stained with BV421  
809 conjugated CD11b antibody (Biolegend, 101235) and 100 nM biotinylated ATV:TREM2  
810 antibody for 45 min on ice. ATV:TREM2 and isotype biotinylation was performed using  
811 EZ-link sulfo-NHS-LS-biotin kit following the manufacturer's instruction (Thermo scientific,  
812 A39257). After washing with 1X FACS buffer for 3 times, cells were then stained with APC  
813 conjugated Streptavidin (Biolegend, 405207) for 30 min on ice. After washing 3 time with  
814 1X FACS buffer, the stained cells were then analyzed on flow cytometer Canto (BD  
815 FACSDiva software V9.0). FCS files were then imported and analyzed in FlowJo software  
816 (V10).

#### 817 **Cell-based shedding blocking**

818 One day prior to assay, hTREM2-DAP12 HEK293 were plated at 50,000 cells/well on a  
819 96 well plate coated with Poly-D-Lysine. Antibodies were diluted in HEK293 media  
820 (DMEM, 10% FBS, 1% Glutamax, 1% Penicillin-streptomycin) starting from 300 nM and  
821 proceeding in a 10-point serial dilution titration with half-log dilutions between points. The  
822 cells were dosed with the antibodies or 1uM TACE inhibitor GM6001 (Adooq Bioscience  
823 A13320-50) and incubated for 24 hours. After incubation with the antibodies, the plate

824 was spun down to remove debris and the supernatants collected for soluble TREM2  
825 measurement.

#### 826 **Detection of mouse or human TREM2 protein levels by MSD**

827 Soluble TREM2 was measured as follows. 96 well MSD small spot streptavidin plates  
828 (MSD - Meso Scale Discovery) were blocked with MSD Blocker-A (MSD) for 1 hour at  
829 RT. Plates were then washed 3x with TBST, then coated with biotinylated anti-TREM2  
830 polyclonal antibody (R&D Systems BAF1828 for human, BAF1729 for mouse) at 1 ug/mL  
831 at RT for 1 hour. Standards (recombinant human or mouse TREM2 ECD prepared in  
832 house) were prepared in Assay Buffer (25% MSD Blocker-A in TBST) and serially diluted  
833 1:4 in Assay Buffer. For cell-based samples, samples and standards were heated to 95C  
834 for 5 min in an SDS-containing buffer. Samples were diluted 1:20 for mouse CSF and  
835 1:10 for cell supernatant. Plates were washed 3x with TBST, then 30 uL of the samples  
836 or standards were added to the plates and incubated for one hour. Subsequently, for  
837 mouse samples, primary antibody 4D9 at 110ug/mL prepared in house was directly added  
838 to the plate (3.3 uL/well), and incubated another hour at RT. Then, plates were washed  
839 3x with TBST, and the primary detection antibody, sulfo-tagged goat anti-human TREM2  
840 (R&D Systems AF1828 sulfo-tagged as per the MSD Gold Sulfo-tag NHS-ester kit  
841 protocol (MesoScale, R3122-A) or sulfo-tagged goat anti-human IgG (MSD, R32AJ-1) for  
842 mouse TREM2 detection, was diluted to 0.5 ug/mL in Assay Buffer, added to the plates,  
843 and incubated for one hour at room temperature. After washing with TBST, the MSD  
844 plates were developed using 2x MSD read buffer T, followed by detection using an MSD  
845 Sector plate reader (Methodical Mind, V1.0.38). MSD values were converted to absolute  
846 concentrations of TREM2.

847 **Liposome response assay (chronic antibody exposure):** Cells (30,000 iMG/well) were  
848 plated on PDL-coated 96-well plates in full serum media. After 24 hours at 37°C, the  
849 media was exchanged for full serum media containing 100nM ATV:TREM2 antibody or  
850 isotype control. After 24 hour incubation at 37°C, the media was removed and the cells  
851 were washed once with PBS. Cells were then dosed with either liposomes (1mg/mL in  
852 PBS) or PBS for 5 min at 37°C, then the cells were lysed in 25uL CST (Cell Signaling  
853 Technologies) lysis buffer containing 1mM PMSF (phenylmethylsulfonylfluoride, Sigma  
854 Aldrich). Lysate was assessed for pSyk levels using AlphaLisa.

#### 855 **Human macrophage survival assay**

856 Primary human donor blood was obtained from Vitalant (San Francisco, CA, USA) in 10  
857 mL TrimaLeukoReduction chambers. Monocytes were enriched using the RosetteSep  
858 Monocyte Isolation Antibody cocktail (Stemcell technologies, 15068) following the  
859 manufacture's protocol. For antibody surface immobilization, antibodies were prepared  
860 with serial dilutions in PBS and added 50 uL per well in 96-well plates (Thermo scientific,  
861 161093) followed by incubation at 4C overnight. On the next day, the antibody coated  
862 plates were washed once with PBS and seeded with 100K cells/well monocytes in RPMI-  
863 GlutaMAX media (Gibco, 61870-036) containing 10% FBS (Hyclone, SH30070.03), 1%  
864 Sodium Pyruvate (Gibco, 11360-070), 1% Glutamax (Gibco, 35050-061), 1% NEAA  
865 (Gibco, 11140-050), 1% Penn/Strep (Gibco, 15140-122), 5 ng/mL M-CSF (Gibco,  
866 PHC9504). Cells were maintained at 37C with 5% CO2 for 5 days. Cell viability were  
867 measured by CellTiter-Glo Luminescent cell viability assay kit (Promega, G7571)  
868 according to the manufacture's protocol. Luminescence was measured by transferring  
869 the lysate to opaque 96 well plates (Costar, 3693) and read by plate reader (Bioteck,

870 NEO2SMALPHA) with 20 ms Integration and 135 gain. Data obtained from a total of 4  
871 donors were shown as biological replicates.

#### 872 **TfR reconstitution and cis/trans model differentiation assay**

873 To remove endogenous TfR expression from the hTREM2-DAP12 HEK293, TfR<sup>RNAi</sup> cells  
874 were generated by transducing the parental cell line with a lentiviral construct expressing  
875 dox-inducible shRNA against human TFRC gene (Horizon, V3SH7669-230884572).  
876 Stable cell line was obtained after selection with 2 ug/mL puromycin for 14 days. To  
877 initiate TFRC knockdown, cells were maintained in DMEM media (Gibco, 11965092)  
878 containing 100 ng/mL doxycycline for at least 72 h before use. For TfR reconstitution  
879 assay, full-length recombinant TfR was generated as previously described <sup>34</sup>.  
880 Recombinant TfR was diluted in PBS starting at 25 nM and proceeding in a 11-point  
881 titration with 2-fold dilutions between points. 10 nM TREM2 antibody was then added and  
882 the antibody mixture was incubated at 4C overnight. The solution was warmed at 37C for  
883 1 hr on the day of use. Control assay using anti-human IgG Fc antibody (Fisher scientific,  
884 NC9915585) was performed the same way. For cis/trans differentiation assay, equal  
885 amount of the parental TREM2/DAP12 overexpressing cells were either mixed or seeded  
886 separately with the TfR<sup>RNAi</sup> cells 24 h before experiment. Antibody solution containing 100  
887 nM TREM2 antibodies were prepared in PBS. Antibody treatment was performed at 37C  
888 for 5 min, followed by alphascreen measurement of pSYK activity as previously described in  
889 Methods.

#### 890 **Surface and total TREM2 measurements by immunofluorescence**

891 For evaluation of surface and total TREM2 receptor levels upon treatment with antibody,  
892 hTREM2-DAP12 HEK293 cells were dosed as above with 10nM antibody for 10 min, then

893 immediately put on ice and stained for surface TREM2 for 45 min with 1:250 goat anti-  
894 human TREM2 (RnD clone AF1828) in DMEM including 5% FBS and 25mM HEPES.  
895 Cells were washed 1x with PBS, then fixed for 10 min with 4% paraformaldehyde in PBS.  
896 Cells were subsequently blocked with 5% BSA in PBS for 30 min at room temperature,  
897 then stained at 1:500 Alexa 488 anti-goat (ThermoFisher A11055) for 45 min at room  
898 temperature. Cells were then imaged using an Opera Phoenix High Content Imager and  
899 images quantified using a spot finding algorithm as described above to obtain surface  
900 TREM2 levels. To measure total TREM2, cells were then blocked and permeabilized for  
901 30 min in 0.3% Triton / 5% BSA in PBS, then stained overnight at 4C with 1:250 of goat  
902 anti-human TREM2 (RnD clone AF1828) in 0.06% Triton / 1% BSA in PBS. Cells were  
903 then washed 3x with PBS and stained at 1:500 with Alexa 488 anti-human IgG  
904 (ThermoFisher A11055) in 0.06% Triton / 1% BSA in PBS for 45 min at room temperature.  
905 Cells were stained with 1:1000 dilution of 1mg/mL DAPI (ThermoFisher 62248) in PBS  
906 for 10 min, then washed 2x with PBS and imaged using an Opera Phoenix High Content  
907 Imager and images quantified using a spot finding algorithm as described above to obtain  
908 total TREM2 levels.

#### 909 **Human cytokine profiling of culture media from iMG treated with ATV:TREM2**

910 WT iMG cell were treated with 100 nM ATV:TREM2 or isotype control for 96 h. In control  
911 group, WT iMG cells was treated with 10 ng/mL LPS or PBS as vehicle control for 24 h.  
912 Culture media was then collected and frozen in -80C. Cytokine in culture media was then  
913 measured by the Human Cytokine Array/Chemokine Array 42-Plex with IL-18 (Eve  
914 Technologies, HD42).

#### 915 **Tissue homogenization**

916 Fresh perfused brain was snap frozen before lysing in 10x v/w 1% NP40 (Thermo 85124)  
917 in PBS with protease and phosphatase inhibitors (Roche 04693132001 and  
918 04906837001). Tissue was homogenized using a Tissue Lyser II (Qiagen, 85300) and 3  
919 mm beads (Qiagen 69997) for two three-minute sessions at 27 Hz at 4°C. Following a 20  
920 minute incubation on ice samples were centrifuged for 20 minutes at 14,000 x g at 4°C  
921 and the supernatant used for PK analyses and western blot.

## 922 **Capillary depletion**

923 All steps were performed at 4°C using methods previously described<sup>35</sup>. Briefly, the  
924 meninges and choroid plexuses were removed from a piece of fresh perfused brain and  
925 the brain then homogenized by ten strokes with a Dounce homogenizer (smaller diameter  
926 pestle) in 3.5 mL HBSS. Cells were pelleted by centrifugation for 10 min at 1,000 x g and  
927 then resuspended in 2 mL of 17% dextran (MW 60,000; Sigma 31397) prepared in HBSS.  
928 Centrifugation for 15 min at 4,122 x g separated the parenchymal cells and myelin into  
929 the dextran layer and pelleted the vasculature. The parenchymal cells and myelin were  
930 separated into a new tube and the dextran diluted with HBSS to allow pelleting of the cells  
931 following a 15 min centrifugation at 4,122 x g. The parenchymal and vascular cell pellets  
932 were then lysed in 1% NP40 in PBS with protease and phosphatase inhibitors (Roche  
933 04693159001 and 04906837001) and agitated using the Tissue Lyser II (Qiagen, 85300)  
934 for 30 seconds at 27 Hz. Following centrifugation at 12,700 x g for 10 min the supernatant  
935 was collected and snap frozen for use in PK, BCA, and western blot assays.

## 936 **SDS PAGE and Western Blot**

937 Tissue or capillary depletion lysates were prepared in 4X LDS sample buffer (Invitrogen  
938 NP0007) and 10X reducing agent (Invitrogen NP0009) and boiled at 95C for 10



939 minutes. Samples were loaded into NuPAGE 4-12% Bis-Tris Midi Protein Gels  
 940 (Invitrogen WG1402 or WG1401) along with Precision Plus Protein Dual Color Ladder  
 941 (Biorad 161-0374) and separated using the XCell4 SureLock system (Invitrogen,  
 942 WR0100). Proteins were transferred to nitrocellulose blots (Biorad 1704159) using a  
 943 BioRad Transblot Turbo system. Blots were blocked in 5% nonfat milk powder for 1 h at  
 944 room temperature, incubated with primary antibodies diluted in blocking buffer  
 945 (Rockland MB-070-010 TF) at 4°C overnight, washed in three times in TBST for 15 min  
 946 each, incubated in secondary antibodies in blocking buffer (Rockland) for 2 h, then  
 947 washed in TBST three times for 15 min each. Blots were imaged using the Odyssey  
 948 CLx and bands quantified using Image Studio Lite Software (LI-COR).

| Antibody                     | Source     | Cat      | Dilution |
|------------------------------|------------|----------|----------|
| Transferrin receptor (H68.4) | Thermo     | 13-6800  | 1:2000   |
| CD31                         | CST        | 77699    | 1:1000   |
| GAPDH                        | Abcam      | Ab181603 | 1:5000   |
| CLDN5                        | Invitrogen | 35-2500  | 1:500    |

949

## 950 **Immunohistochemistry**

951 One fresh, perfused brain hemisphere was immersion fixed for 24 h in 4% PFA before  
 952 gelatin embedding and sectioning (40 µm) at Neuroscience Associates. Sheets of brain  
 953 sections were rinsed in PBS then blocked for three hours in 1% BSA with 0.1% fish  
 954 gelatin in PBS with 0.1% Triton X-100 and 0.1% sodium azide. Sections were then  
 955 incubated overnight with primary antibodies at 4°C in in 1% BSA in PBS with 0.3%  
 956 Triton X-100 (PBSX), washed three times for 15 min each in PBSX, then incubated for

three hours with secondary antibodies and DAPI in 1% BSA in PBSX at room temperature. Sections were washed three times for 15 min each in PBSX, mounted onto slides, and cover slipped using Prolong Glass Antifade Mountant.

| Antibody                                                  | Source                  | Cat         | Dilution |
|-----------------------------------------------------------|-------------------------|-------------|----------|
| Iba1                                                      | Abcam                   | ab178847    | 1:500    |
| Donkey F(ab') <sub>2</sub> -anti-human IgG AlexaFluor 647 | Jackson Immuno Research | 709-606-149 | 1:250    |

### **Confocal imaging and quantification of intracellular antibody levels**

To quantify the intracellular localization of hulgG, sections were imaged using a scanning confocal microscope (Leica SP8; Leica Microsystems, Inc). operated in super resolution LIGHTNING mode, acquired with a 10X/0.4 NA oil objective at a pixel size of 200 nm and processed using the Adaptive processing algorithm. Confocal z-stacks were obtained at a spacing of 4 µm, final stack size of 40 µm, were acquired for each channel using sequential scan settings from both neocortical and hippocampal brain regions and from 3-4 mice per treatment group. The intramicroglial hulgG signal was masked using an intensity-based segmentation of Iba1-positive pixels, and the resulting sum intensities were normalized to the total microglial volume within a given three-dimensional image field. The calculated mean intensities were determined for each mouse and used to calculate the mean ± SEM for each treatment.

### **Generation of human Trem2 BAC transgenic mouse model**

Human Trem2 BAC transgenic (tg) mouse model was used to evaluate the human specific ATV:TREM2 antibody in vivo. This mouse model was generated at Denali by introduction of engineered BAC DNA CTD-2210D2 into the pronucleus of fertilized mouse

977 eggs from C57BL/6J mice. The engineered BAC DNA CTD-2210D2 clone covers entire  
978 human Trem2 coding region and its regulatory elements with deletion of the exon 1 from  
979 TREML1 and exon 3 from TREML2 to abolish the expression of TREML1 and TREML2.  
980 Human Trem2 BAC tg mice were backcrossed to C57BL/6J mice for three rounds and  
981 maintained as hemizygous and then further bred with TfR<sup>mu/hu</sup> mice to generate human  
982 TREM2 BAC tg; TfR<sup>mu/hu</sup> mice for in vivo studies. Mice were bred at JAX Laboratories and  
983 transferred to Denali at least two weeks before the initiation of the study for acclimation.  
984 Mice were housed in standard conditions in Denali's vivarium with ad libitum access to  
985 food and water.

## 986 **SPECT/CT imaging of radiolabeled antibodies**

### 987 *<sup>125</sup>I and <sup>111</sup>In radiolabeling*

988 Anti-TREM2, ATV:TREM2 and isotype (ATV:ISO) were radiolabeled with <sup>125</sup>I or <sup>111</sup>In.  
989 [<sup>125</sup>I]SIB labeled antibodies were produced by incubating N-Succinimidyl-3-(tri-n-  
990 butylstannyl) benzoate (ATE) with Na<sup>125</sup>I. The crude product was purified with [<sup>125</sup>I]SIB  
991 coupled to the appropriate antibody. Separately, antibodies were radiolabeled with <sup>111</sup>In  
992 once following conjugation with 1,4,7,10-tetraazacyclododecane-1,4,7,10-tetraacetic acid  
993 (DOTA). Antibodies were buffer exchanged into 0.1 M sodium bicarbonate pH 8.8 using  
994 a 0.5 mL 30 kDa Amicon centrifuge filters, then conjugated with p-SCN-Bn-DOTA  
995 prepared in 0.1M HEPES pH 8.3 at a molar ratio of 20:1 (DOTA:antibody). The reaction  
996 mixture was heated at 37°C for 90 minutes then left at room temperature overnight. The  
997 following day, the reaction solution was transferred to 0.5 mL 30 kDa Amicon tubes for  
998 purification, with the DOTA conjugated material stored at 4°C until use. For <sup>111</sup>In  
999 radiolabeling, the conjugated antibody was added to a vial containing <sup>111</sup>InCl which had

1000 been neutralized with 3x volume of 0.25 M sodium acetate, pH 5.5. The reaction mixture  
1001 was then incubated at 37°C for one hour. All radiolabeled antibodies were purified via  
1002 Amicon filters, with radiochemical purity assessed via HPLC.

### 1003 *In vivo imaging*

1004 Antibodies labeled with  $^{125}\text{I}$  or  $^{111}\text{In}$  were separately administered to WT; hTREM2 tg;  
1005 TfR<sup>mu/hu</sup> mice by tail vein injection (100  $\mu\text{Ci}$ , 200  $\mu\text{L}$ , 1.5 mg/kg). Mice (n=48, male and  
1006 female) were separated into six groups (n=4/group). Three mice per group underwent a  
1007 30-minute whole body multi-animal SPECT/CT acquisitions at 2, 24, 48, 72, and 96 h  
1008 post-radiotracer administration, using a 3-bed configuration. One subject per group  
1009 underwent a 30-minute whole body single-animal SPECT/CT acquisition.

### 1010 *Ex vivo biodistribution*

1011 Following SPECT/CT imaging at the final imaging timepoint (96 h), all subjects per group  
1012 were euthanized and select tissues were resected for further radioanalysis using a  
1013 gamma counter. Specifically, cerebrospinal fluid (CSF) was collected then the mice were  
1014 saline-perfused and necropsied. Seven brain regions were collected for gamma counting:  
1015 cerebral cortex, caudo-putamen, cerebellum, mid-brain, hindbrain, hippocampus, and  
1016 hypothalamus.

### 1017 *SPECT image processing*

1018 Reconstructed images from the NanoScan SPECT/CTTM were generated in units of  
1019 activity. Namely, the values assigned to the voxels (volume elements) comprising the 3D  
1020 reconstructed SPECT images were in units of  $\mu\text{Ci}$ . Images of multi-animal hotels were  
1021 split into individual animal focused data. Reconstructed SPECT and CT images were co-

1022 registered to one another and resampled to uniform voxel size (0.2 x 0.2 x 0.2 mm<sup>3</sup>) using  
1023 VivoQuant software (Invicro). The imaging bed was removed from the CT images.

#### 1024 *Estimating tissue uptake from SPECT data*

1025 Regions of interest (ROIs) in the SPECT/CT data were defined using VivoQuant software.  
1026 Brain regions, including whole brain and sub-regions, were generated using a 3D mouse  
1027 brain atlas tool in VivoQuant. Heart ROIs were generated by placing fixed volume  
1028 phantoms within the respective organs based on anatomical location on CT along with  
1029 SPECT uptake where present.

1030 Group and individual master spreadsheets were generated that include the activity  
1031 concentration (percent injected dose per gram, %ID/g) at each time point for each ROI  
1032 generated. SPECT/CT results from multi-animal and single-animal acquisitions were kept  
1033 separate due to the differences in spatial resolution and sensitivity between the two sets  
1034 of apertures used for data collection. Results were presented in units of percent injected  
1035 dose per gram (%ID/g). Brain ROI results were corrected for cerebral blood flow  
1036 contribution to activity concentration by using the heart ROI %ID/g as a surrogate for  
1037 activity concentration in the blood pool. Blood pool activity concentration was multiplied  
1038 by the fractional cerebral blood volume for whole mouse brain<sup>36</sup> and subtracted from the  
1039 activity concentration value from the whole brain ROI.

#### 1040 **TfR MSD assay and quantification**

1041 The mouse TfR MSD assay was developed by conjugating TfR capture and detection  
1042 antibodies provided in the Mouse Transferrin Receptor Antibody ELISA kit (Abcam  
1043 ab256631) to biotin or MSD Sulfo-tag NHS-Ester, respectively, according to each  
1044 manufacturer's protocol (Thermo Scientific EZ-Link Sulfo-NHS-LC-Biotin and MSD

1045 GOLD™ SULFO-TAG NHS-Ester). Briefly, using automated robotics systems (Agilent  
 1046 Bravo with a 96LT head and Dynamic Devices Lynx with a 96 VVP (Variable volume  
 1047 pipette) head) and constant plate agitation at 700RPM (Thermo Scientific™ Compact  
 1048 Digital Microplate Shaker plate shaker brand), an MSD Gold Streptavidin 384-well plate  
 1049 was blocked with 5% MSD blocker for 1 hour at room temperature (RT), washed with  
 1050 PBST, incubated with 0.125 µg/mL biotin-capture antibody for 1 hour at RT, washed again  
 1051 with PBST and incubated overnight with brain lysate at 4°C. Following the overnight  
 1052 incubation, the 384-well plate was washed with PBST, incubated with 0.25µg/mL Sulfo-  
 1053 tag-detection antibody for 1 hour at RT, washed once more, incubated with 2x MSD read  
 1054 buffer for 10-15 minutes at RT and read on an MSD plate reader (Meso Sector S 600) to  
 1055 acquire data. MSD data was analyzed in GraphPad Prism using a Sigmoidal, 4PL  
 1056 standard curve to interpolate mouse TfR concentrations from MSD values. Mouse TfR  
 1057 concentrations were normalized to total protein concentrations (determined by standard  
 1058 BCA quantification) of each respective lysate. Data were subsequently analyzed using  
 1059 unpaired, nonparametric Student's t-test.

1060

## 1061 **References**

- 1062 1. Kober, D.L., *et al.* Neurodegenerative disease mutations in TREM2 reveal a  
 1063 functional surface and distinct loss-of-function mechanisms. *Elife* **5**(2016).
- 1064 2. Lee, K., Lu, R., Luther, K. & Seung, H.S. Learning and Segmenting Dense Voxel  
 1065 Embeddings for 3D Neuron Reconstruction. *IEEE Transactions on Medical*  
 1066 *Imaging* **40**, 3801-3811 (2021).
- 1067 3. van der Walt, S., *et al.* scikit-image: image processing in Python. *PeerJ* **2**, e453  
 1068 (2014).
- 1069 4. Nunez-Iglesias, J., Blanch, A.J., Looker, O., Dixon, M.W. & Tilley, L. A new Python  
 1070 library to analyse skeleton images confirms malaria parasite remodelling of the red  
 1071 blood cell membrane skeleton. *PeerJ* **6**, e4312 (2018).
- 1072 5. Karperien, A., Ahammer, H. & Jelinek, H. Quantitating the subtleties of microglial  
 1073 morphology with fractal analysis. *Frontiers in Cellular Neuroscience* **7**(2013).

- 1074 6. Pedregosa, F., *et al.* Scikit-learn: Machine Learning in Python. *J. Mach. Learn.*  
1075 *Res.* **12**, 2825–2830 (2011).
- 1076 8. Hao, Y., *et al.* Integrated analysis of multimodal single-cell data. *Cell* **184**, 3573-  
1077 3587 e3529 (2021).
- 1078 9. He, D., *et al.* Alevin-fry unlocks rapid, accurate and memory-frugal quantification  
1079 of single-cell RNA-seq data. *Nature Methods* **19**, 316-322 (2022).
- 1080 10. Zhu, A., Srivastava, A., Ibrahim, J.G., Patro, R. & Love, M.I. Nonparametric  
1081 expression analysis using inferential replicate counts. *Nucleic Acids Research* **47**,  
1082 e105-e105 (2019).
- 1083 11. Amezquita, R.A., *et al.* Orchestrating single-cell analysis with Bioconductor. *Nat*  
1084 *Methods* **17**, 137-145 (2020).
- 1085 12. Zeisel, A., *et al.* Molecular Architecture of the Mouse Nervous System. *Cell* **174**,  
1086 999-1014 e1022 (2018).
- 1087 13. Aran, D., *et al.* Reference-based analysis of lung single-cell sequencing reveals a  
1088 transitional profibrotic macrophage. *Nat Immunol* **20**, 163-172 (2019).
- 1089 14. van den Brink, S.C., *et al.* Single-cell sequencing reveals dissociation-induced  
1090 gene expression in tissue subpopulations. *Nat Methods* **14**, 935-936 (2017).
- 1091 15. McCarthy, D.J., Campbell, K.R., Lun, A.T. & Wills, Q.F. Scater: pre-processing,  
1092 quality control, normalization and visualization of single-cell RNA-seq data in R.  
1093 *Bioinformatics* **33**, 1179-1186 (2017).
- 1094 16. Ritchie, M.E., *et al.* limma powers differential expression analyses for RNA-  
1095 sequencing and microarray studies. *Nucleic Acids Research* **43**, e47-e47 (2015).
- 1096 17. Korotkevich, G., *et al.* Fast gene set enrichment analysis. *bioRxiv*, 060012 (2021).
- 1097 18. Liberzon, A., *et al.* The Molecular Signatures Database (MSigDB) hallmark gene  
1098 set collection. *Cell Syst* **1**, 417-425 (2015).
- 1099 19. Dobin, A., *et al.* STAR: ultrafast universal RNA-seq aligner. *Bioinformatics* **29**, 15-  
1100 21 (2013).
- 1101 20. Liao, Y., Smyth, G.K. & Shi, W. featureCounts: an efficient general purpose  
1102 program for assigning sequence reads to genomic features. *Bioinformatics* **30**,  
1103 923-930 (2014).
- 1104 21. Nugent, A.A., *et al.* TREM2 Regulates Microglial Cholesterol Metabolism upon  
1105 Chronic Phagocytic Challenge. *Neuron* **105**, 837-854 e839 (2020).
- 1106 22. Law, C.W., Chen, Y., Shi, W. & Smyth, G.K. voom: Precision weights unlock linear  
1107 model analysis tools for RNA-seq read counts. *Genome Biol* **15**, R29 (2014).
- 1108 23. Huber, W., *et al.* Orchestrating high-throughput genomic analysis with  
1109 Bioconductor. *Nat Methods* **12**, 115-121 (2015).
- 1110 24. Overhoff, F., *et al.* Automated Spatial Brain Normalization and Hindbrain White  
1111 Matter Reference Tissue Give Improved [(18)F]-Florbetaben PET Quantitation in  
1112 Alzheimer's Model Mice. *Front Neurosci* **10**, 45 (2016).
- 1113 25. Reifschneider, A., *et al.* Loss of TREM2 rescues hyperactivation of microglia, but  
1114 not lysosomal deficits and neurotoxicity in models of progranulin deficiency. *EMBO*  
1115 *J* **41**, e109108 (2022).
- 1116 26. Deussing, M., *et al.* Coupling between physiological TSPO expression in brain and  
1117 myocardium allows stabilization of late-phase cerebral [(18)F]GE180 PET  
1118 quantification. *Neuroimage* **165**, 83-91 (2018).

- 1119 27. Biechele, G., *et al.* Pre-therapeutic microglia activation and sex determine therapy  
1120 effects of chronic immunomodulation. *Theranostics* **11**, 8964-8976 (2021).
- 1121 28. Schiffer, W.K., Mirrione, M.M. & Dewey, S.L. Optimizing experimental protocols for  
1122 quantitative behavioral imaging with 18F-FDG in rodents. *J Nucl Med* **48**, 277-287 (2007).
- 1123 29. Xiang, X., *et al.* Microglial activation states drive glucose uptake and FDG-PET alterations  
1124 in neurodegenerative diseases. *Sci Transl Med* **13**, eabe5640 (2021).
- 1125 30. Logan, J., *et al.* Graphical analysis of reversible radioligand binding from time-activity  
1126 measurements applied to [N-11C-methyl]-(-)-cocaine PET studies in human subjects. *J*  
1127 *Cereb Blood Flow Metab* **10**, 740-747 (1990).
- 1128 31. Sacher, C., *et al.* Longitudinal PET Monitoring of Amyloidosis and Microglial Activation in  
1129 a Second-Generation Amyloid-beta Mouse Model. *J Nucl Med* **60**, 1787-1793 (2019).
- 1130 32. Ma, Y., *et al.* A three-dimensional digital atlas database of the adult C57BL/6J mouse brain  
1131 by magnetic resonance microscopy. *Neuroscience* **135**, 1203-1215 (2005).
- 1132 33. Schlepckow, K., *et al.* Enhancing protective microglial activities with a dual function  
1133 TREM2 antibody to the stalk region. *EMBO Mol Med* **12**, e11227 (2020).
- 1134 34. Arguello, A., *et al.* Molecular architecture determines brain delivery of a transferrin  
1135 receptor-targeted lysosomal enzyme. *J Exp Med* **219**(2022).
- 1136 35. Kariolis, M.S., *et al.* Brain delivery of therapeutic proteins using an Fc fragment blood-  
1137 brain barrier transport vehicle in mice and monkeys. *Sci Transl Med* **12**(2020).
- 1138 36. Chugh, B.P., *et al.* Measurement of cerebral blood volume in mouse brain regions using  
1139 micro-computed tomography. *Neuroimage* **47**, 1312-1318 (2009).

1140

1141
